## **ATXN10 is required for embryonic heart development and maintenance of epithelial cell phenotypes in the adult kidney and pancreas**

**Melissa R. Bentley-Ford<sup>1</sup>, Reagan S. Andersen<sup>1</sup>, Mandy J. Croyle<sup>1</sup>, Courtney J. Haycraft<sup>1</sup>, Kelsey R. Clearman<sup>1</sup>, Jeremy B. Foote<sup>3</sup>, Jeremy F. Reiter<sup>2</sup>, Bradley K. Yoder<sup>1\*</sup>**

<sup>1</sup>Yoder Laboratory, University of Alabama at Birmingham, Department of Cell, Developmental and Integrative Biology, Birmingham, AL, USA

<sup>2</sup>Reiter Laboratory, University of California San Francisco, Department of Biochemistry and Biophysics, San Francisco, CA, USA

<sup>3</sup>University of Alabama at Birmingham, Department of Microbiology, Birmingham, AL, USA

**\* Correspondence:**

Corresponding Author  
byoder@uab.edu

**Keywords: ATXN10, EMT, Cilia, ADM, Heart, Kidney, Pancreas**

1 **Abstract:**

2 *Atxn10* is a gene known for its role in cytokinesis during the cell cycle and is associated with  
3 Spinocerebellar Ataxia (SCA10), a slowly progressing cerebellar syndrome caused by an  
4 intragenic pentanucleotide repeat expansion. *Atxn10* is also implicated in the ciliopathy syndromes  
5 Nephronophthisis (NPHP) and Joubert Syndrome (JBTS), which are caused by disruption of cilia  
6 function leading to nephron loss, impaired renal function, and cerebellar hypoplasia. How *Atxn10*  
7 disruption contributes to these disorders remains unknown. Here we generated *Atxn10* congenital  
8 and conditional mutant mouse models. Our data indicate that while ATXN10 protein can be  
9 detected around the base of the cilium as well as in the cytosol, its loss does not cause overt changes  
10 in cilia formation or morphology. Congenital loss of *Atxn10* results in embryonic lethality around  
11 E10.5 associated with pericardial effusion and loss of trabeculation. Similarly, tissue specific loss  
12 of ATXN10 in the developing endothelium (Tie2-Cre) and myocardium (cTnT-Cre) also results  
13 in embryonic lethality with severe cardiac malformations occurring in the latter. Using an  
14 inducible Cagg-CreER to disrupt *Atxn10* systemically, we show that ATXN10 is also required for  
15 survival in adult mice. Loss of ATXN10 results in severe pancreatic and renal abnormalities  
16 leading to lethality within a few weeks post ATXN10 deletion in adult mice. Evaluation of these  
17 phenotypes further identified rapid epithelial to mesenchymal transition (EMT) in these tissues. In  
18 the pancreas, the phenotype includes signs of both acinar to ductal metaplasia and EMT with  
19 aberrant cilia formation and severe defects in glucose homeostasis related to pancreatic  
20 insufficiency or defects in feeding or nutrient intake. Collectively this study identifies ATXN10  
21 as an essential protein for survival.

22

23 **Introduction :**

24 *Ataxin10* (ATXN10) is most commonly associated with spinocerebellar ataxia type 10  
25 (SCA10), which is caused by an ATTCT pentanucleotide expansion within intron 9 (Matsuura et  
26 al., 2000). The consequences of the pentanucleotide expansion on *Atxn10* function or non-  
27 expansion coding mutations on the function of ATXN10 remain unclear. Investigation of the  
28 pentanucleotide expansion mutation indicates that the allele is transcribed at normal levels and is  
29 spliced normally (Wakamiya et al., 2006). To date, the only reported human incidence of ATXN10  
30 mutation (IVS8-3T>G) was observed in three Turkish siblings from a consanguineous family. This  
31 mutation resulted in Nephronophthisis-like kidney defects that ultimately led to death as infants

32 (Sang et al., 2011). This same study further identified ATXN10 as a Nephronophthisis (NPHP)  
33 and Joubert Syndrome (JBTS) associated gene that indirectly interacts with the ciliary transition  
34 zone protein, NPHP5, near the base of the cilium. NPHP is a form of medullary cystic kidney  
35 disease with associated nephron loss (Luo and Tao, 2018), while JBTS is autosomal recessive or  
36 X-linked cerebellar ataxia associated with cerebellar hypoplasia (Romani et al., 2013). Both NPHP  
37 and JBTS fall into the class of disorders collectively termed ciliopathies. Ciliopathies result from  
38 improper structure or function of the primary cilium. These small microtubule based appendages  
39 are present on the surface of nearly every mammalian cell type and are crucial for mediating many  
40 cell signaling events (Sharma et al., 2008).

41 Knockdown of *Atxn10* in rat primary cortical and especially cerebellar neurons is cytotoxic  
42 (Marz et al., 2004). Interestingly, overexpression of *Atxn10* alone is sufficient to induce  
43 neuritogenesis in neuronal precursor cells where it interacts with the G-protein  $\beta 2$  subunit to drive  
44 activation of the RAS-MAPK-ELK-1 signaling cascade (Waragai et al., 2006). Furthermore,  
45 Aurora B phosphorylation of ATXN10 promotes its interaction with polokinese 1 (Plk1) (Tian et  
46 al., 2015). This interaction between ATXN10 and Plk1 is necessary for cytokinesis *in vitro* (Li et  
47 al., 2011). The function of ATXN10 *in vivo* remains largely unresolved.

48 To initiate studies into the *in vivo* functions of ATXN10, we established congenital  
49 (*Atxn10<sup>KO</sup>*) and conditional (*Atxn10<sup>fllox</sup>*) mutant mice and assessed the consequence of ATXN10  
50 loss during both embryogenesis and in adult tissues. Congenital loss of ATXN10 results in severe  
51 cardiac development abnormalities and gestational lethality. Tissue specific ablation of ATXN10  
52 in the developing endothelium and myocardium similarly result in embryonic lethality. Induction  
53 of ATXN10 loss in adult mice causes lethality due to moderate to severe pancreatic, renal, and  
54 gastrointestinal abnormalities, and severe defects in glucose homeostasis. Further analysis of renal  
55 phenotypes revealed an epithelial to mesenchymal transition (EMT) of the kidney tubule epithelial  
56 cells. Similarly, in the pancreas, acinar cells appear to undergo a transdifferentiation process  
57 resulting in more progenitor-like phenotypes.

58 Previous work indicates that ATXN10 is predominantly a cytoplasmic protein with cell  
59 cycle dependent localization of the phosphorylated protein (on Serine 12), to the Golgi during  
60 interphase, the centrioles during prophase, and the midbody during telophase. Our studies  
61 similarly indicate that localization of ATXN10 is predominantly cytoplasmic; however, it is  
62 enriched near the centrioles and at the base of the primary cilium. While a ciliary role for ATXN10

63 cannot be excluded, we show that loss of ATXN10 does not affect ciliogenesis in fibroblast or  
64 epithelial cells, although acini in *Atxn10* postnatal-induced mutants do exhibit ectopic cilia  
65 possibly associated with changes in cell type.

66

## 67 **Results :**

### 68 *Loss of ATXN10 does not affect cilia formation or maintenance*

69 To determine the localization of ATXN10, we generated an EGFP tagged ATXN10  
70 (ATXN10::EGFP) for expression in cultured cells. Overexpression of ATXN10::EGFP in Inner  
71 Medullary Collecting Duct (IMCD) cells supports a predominantly cytoplasmic expression  
72 pattern; however, enrichment of ATXN10::EGFP near *Fgfr1*op (FOP) positive centrioles or basal  
73 bodies is seen in 79.3% of transfected cells, regardless of whether they had a primary cilium. Of  
74 the transfected cells that have cilia, we detected an enrichment of ATXN10 around the base of all  
75 cilia (**Figure 1A**). This information led to the investigation of whether ATXN10 is necessary for  
76 ciliogenesis. In Mouse Embryonic Fibroblasts (MEFs) generated from *Atxn10*<sup>KO</sup> embryos, there  
77 was a trend toward fewer cilia, but these differences were not statistically significant between  
78 *Atxn10*<sup>KO</sup> (33.5%) and control (59.8%) cells (p=0.07) (**Figure 1B**). Similar to published reports,  
79 MEFs generated from *Atxn10*<sup>KO</sup> embryos display cell cycle abnormalities creating difficulties in  
80 maintaining the cells for longer than two or three passages (see below). As the formation of the  
81 primary cilium is tied to the cell cycle (Malicki and Johnson, 2017), we wanted to determine  
82 whether the loss of ATXN10 affected ciliary maintenance following cilia formation. To address  
83 this question, we generated conditional MEFs using *Atxn10*<sup>Cagg</sup> embryos, induced ATXN10 loss  
84 prior to or after confluency and then serum starved to induce cilia formation. If induction occurred  
85 prior to confluency, *Atxn10*<sup>Cagg</sup> MEFs (35.1%) exhibited a non-significant trend towards fewer  
86 cilia compared to controls (42.7%) (p=0.42) (**Figure 1C**). Induction of *Atxn10*<sup>Cagg</sup> MEFs post-  
87 confluency resulted in similar percentages of ciliated cells between control (76.3%) and *Atxn10*<sup>Cagg</sup>  
88 MEFs (72.0%) (p=0.51) (**Figure 1D**).

89 Although cilia formation in MEFs is not significantly affected by loss of ATXN10 in  
90 cultured cells, we did observe abnormalities in cell division based on the frequency of irregular  
91 spindle formations observed along with chromosomal bridges (**Figure 1E, red arrow**). To observe  
92 the effect of ATXN10 loss in an epithelial cell line, primary kidney epithelial cells were isolated  
93 from *Atxn10*<sup>Cagg</sup> mice. Similar to what was observed in MEFs, loss of ATXN10 prior to confluency



94 resulted in cells that failed to grow to confluency and could not be maintained (data not shown).  
95 *Atxn10<sup>Cagg</sup>* primary renal epithelial cells displayed an increased prevalence of cells with two nuclei  
96 (7.6% in *Atxn10<sup>Cagg</sup>* compared to 1.7% in controls, (p=0.33)) (**Figure 1F**). They also exhibited a  
97 large increase in nuclear blebbing and micro nuclei formation (12.7% in *Atxn10<sup>Cagg</sup>* compared to  
98 0% in controls) (**Figure 1G**) and nuclear size was increased in cells induced prior to confluency  
99 (p<0.0001; with nuclear area in control cells averaging 504 $\mu\text{m}^2$ , pre-confluent induced cells  
100 averaging 632 $\mu\text{m}^2$ , and post-confluent induced averaging 799  $\mu\text{m}^2$ ) (**Figure 1H**). The frequency  
101 with which post-confluent induced primary kidney epithelial cells presented a cilium was not  
102 different between control and *Atxn10<sup>Cagg</sup>* cells (68.6% in control cells versus 74.9% in *Atxn10<sup>Cagg</sup>*  
103 cells) (**Figure 1I**). Another consistent observation regarding the primary kidney epithelial cells  
104 was an increase in cell spreading and more fibroblast-like cell morphology following Cre induction  
105 (**Supplemental figure 1F, Figure 1J**). Staining for the epithelial tight junction marker ZO-1  
106 shows a distinct loss of localization in *Atxn10<sup>Cagg</sup>* primary kidney epithelial cells compared to non-  
107 induced controls (**Figure 1J**). Collectively, this supports ATXN10's role in cell division and that  
108 it transiently accumulates around the ciliary basal bodies; however, it is dispensable for  
109 ciliogenesis. These data also indicate a potential role for ATXN10 in maintaining epithelial cell  
110 phenotypes like tight junctions.

111

#### 112 *Atxn10 In Vivo expression analysis.*

113 The promoter driven expression of *LacZ* in the *Tm1a* knockout first (KO) allele (**Figure**  
114 **2A**) allowed gene expression to be examined via  $\beta$ -galactosidase staining. Staining performed on  
115 heterozygous *Atxn10<sup>KO/+</sup>* and wildtype control embryos indicate that *Atxn10* expression begins in  
116 the developing heart tube at embryonic day 8.5 (E8.5) and is predominantly confined to the  
117 developing heart with expression beginning to expand to the surrounding mesoderm and parts of  
118 the neural tube at E10.5 (**Figure 2B and C**). By E11.5 reporter expression has expanded to the  
119 entire embryo.  $\beta$ -galactosidase staining performed on sections of E10.5 *Atxn10<sup>KO/+</sup>* embryos  
120 shows expression of *Atxn10* in both the myocardium and endocardium (**Figure 2C**).

121

#### 122 *Congenital loss of ATXN10 results in pericardial effusion and embryonic lethality.*

123 In agreement with the embryonic lethality reported by the International Mouse  
124 Phenotyping Consortium (IMPC), we found that *Atxn10* mutant embryos die shortly after E10.5

125 (Wakamiya et al., 2006; Dickinson et al., 2016). Embryos at E10.5 are generally smaller than  
126 controls and begin to show pericardial edema (**Figure 2D**). By E10.5 severe pericardial effusion  
127 is observed with lethality occurring shortly after (**Figure 2D**). Immunofluorescence staining of  
128 sections through the heart region using markers for the endothelium (PECAM1) and the  
129 myocardium (cTnT) show that while both layers are present in *Atxn10<sup>KO</sup>* embryos, the walls of the  
130 developing heart are thinned and the heart is larger in volume (**Figure 2E**).

131

132 *Congenital loss of ATXN10 results in neural tube defects.*

133 In addition to the cardiac defects mentioned above, structural abnormalities were also  
134 observed in the neural tubes of mutant embryos (**Figure 2F and G**). H&E staining of E10.5  
135 embryos highlight the thin, disorganized structure of the neural epithelium (**Figure 2F**) and  
136 although the rostral neural tubes have closed, they exhibit an increase in the luminal space. While  
137 the caudal neural tube has not fully closed in the control nor mutant embryos, Ki67 staining in  
138 both rostral and caudal neural tubes indicate that the thinned appearance of the neural tube is likely  
139 not due to a lack of proliferation (**Figure 2G**).

140

141 *Tissue specific ablation of ATXN10 in the myocardium and endothelium results in embryonic*  
142 *lethality.*

143 At the stage that pericardial effusion is observed in *Atxn10<sup>KO</sup>* embryos, interactions  
144 between the developing endocardium and myocardium are crucial for proper development (Samsa  
145 et al., 2013). To determine if the cardiac phenotype seen in congenital knockout mice is specifically  
146 due to loss of ATXN10 in the developing myocardium or endocardium, the conditional *Atxn10*  
147 allele was used (**Figure 3A**). By inducing loss of ATXN10 in the developing endothelium using  
148 the Tek2-Cre (*Tie2*) (Koni et al., 2001), embryos exhibit lethality between E11.5 - E13.5.  
149 *Atxn10<sup>Tie2</sup>* embryos collected at E10.5 are grossly indistinguishable from control littermates  
150 (**Supplemental figure 2A**). Embryos isolated at E12.5 can be distinguished from littermates due  
151 their pale coloration and pooling of blood around the heart (**Figure 3B**). Embryos that can still be  
152 recovered at E13.5 show severe vascular abnormalities (**Supplemental figure 2B**). Staining of  
153 *Atxn10<sup>Tie2</sup>* mutants prior to death indicate that the endothelium is still present in both the developing  
154 heart (**Figure 3C and 3D**) and in the embryonic mesoderm (**Figure 3E**).

155 Using a cTnT-Cre we also assessed the effect of ATXN10 loss in the myocardium (Jiao et  
156 al., 2003). Ultimately these mutants are still embryonic lethal during late gestation; however, at  
157 E18.5 *Atxn10<sup>cTnT</sup>* embryos appear relatively normal except for mild edema around the neck region  
158 of the embryo (data not shown). Closer observation of the heart indicates reduced trabeculation  
159 and ventricular non-compaction compared to controls (**Figure 3F**).

160 The spatiotemporal specificity of gene expression and the failure of the two tissue-specific  
161 mutants to phenocopy the congenital heart phenotype while still resulting in lethality led to the  
162 question of whether embryonic lethality is specific to cardiac abnormalities. To test this, timed  
163 matings were established between *Atxn10<sup>lox/flox</sup>* females and *Atxn10<sup>lox/flox</sup>; Cagg-Cre* positive  
164 males. Pregnant females were then induced 11.5 days into pregnancy. Seven (7) days following  
165 induction (E18.5), the resulting Cre positive embryos exhibited a reduction in the presence of  
166 blood throughout the embryo and their hearts were no longer beating indicating they were  
167 nonviable (**Figure 3G**). Although these embryos had been induced following the initial cardiac  
168 morphological events that were impaired in *Atxn10<sup>KO</sup>* embryos, lethality was still ultimately the  
169 outcome supporting the conclusion that lethality is due to additional defects outside the heart and  
170 blood vessels.

171  
172 *Loss of ATXN10 in adult mice results in pancreatic, renal, and gastrointestinal abnormalities*  
173 *followed by abrupt lethality.*

174 To determine whether ATXN10 is necessary postnatally, loss of ATXN10 was induced in  
175 *Atxn10<sup>Cagg</sup>* adult mice at 4 weeks and 8 weeks of age. Surprisingly, this had dramatic effects with  
176 mice induced at 4 weeks of age failing to gain weight (**Supplemental figure 3A**). When animals  
177 were induced at 8 weeks of age only male mice exhibited a significant weight difference at 17 days  
178 post-induction while female mice seemed to maintain a weight comparable to controls (**Figure**  
179 **4A**). Strikingly, *Atxn10<sup>Cagg</sup>* (Cre positive) mice induced at 4 weeks (data not shown) and 8 weeks  
180 of age resulted in abrupt lethality between 16-26 days post-induction (**Figure 4B**). Pathological  
181 analysis of tissues isolated from control and *Atxn10<sup>Cagg</sup>* animals prior to death indicates that a  
182 major contributor to their death is most likely a result of pancreatic acinar injury. Histology of  
183 *Atxn10<sup>Cagg</sup>* pancreata show cytoplasmic basophilia and acinar cell necrosis with significant  
184 lymphocytic infiltrates within and around affected acini indicating a recent injury to the pancreas  
185 (**Figure 4C**). Analysis of serum glucose levels in non-fasted animals show a significant decrease

186 in blood glucose levels in *Atxn10<sup>Cagg</sup>* animals compared to control (**Figure 4D**). Compared to  
187 control, the pancreata in *Atxn10<sup>Cagg</sup>* animals are significantly smaller in size (**Figure 4E**).  
188 Lethality is likely due to the combined effect of pancreatic damage and reduced food intake  
189 indicated by hyperkeratosis of the non-glandular region of the gastrointestinal tract and hepatocyte  
190 atrophy (Supplemental figure 3C). Further analysis of the stomach in *Atxn10<sup>Cagg</sup>* animals revealed  
191 moderate lymphocytic and neutrophilic infiltrate of the submucosal and mucosal regions.  
192 Additionally, mild crypt dilation, epithelial necrosis, and diffuse, mild epithelial hyperplasia,  
193 dysplasia, and mild mineralization indicated chronic, active gastritis and secondary epithelial  
194 changes (data not shown). Interestingly, these indicators of an ongoing insult to the glandular  
195 epithelium were not observed in the non-glandular regions of the gastrointestinal tract  
196 (duodenum/jejunum, cecum/colon, omentum/mesentery).

197 While pathological analyses of the retina, liver, lung, and spleen (**Supplemental figure**  
198 **3B-3E**) were unremarkable, the kidney presented with histological markers suggestive of a  
199 regenerative response to acute tubular injury marked by cytoplasmic basophilia, an increased  
200 nuclear to cytoplasmic ratio, open chromatin, distinct nucleoli and occasional mitotic figures in  
201 the proximal tubules (**Figure 5A**). Despite these histological findings, blood serum analysis  
202 revealed that while alkaline phosphatase (**Figure 5B**) and blood urea nitrogen (BUN) (**Figure 5C**)  
203 levels are increased in *Atxn10<sup>Cagg</sup>* animals, serum albumin (**Figure 5D**), sodium (**Figure 5E**),  
204 calcium (**Figure 5F**), phosphorus (**Figure 5G**), creatinine (**Figure 5H**), and total protein (**Figure**  
205 **5I**) are not significantly different between control and *Atxn10<sup>Cagg</sup>* animals.

206  
207 *Loss of ATXN10 causes the pancreatic epithelium to become more progenitor-like and results in*  
208 *ectopic primary cilia growth.*

209 Within the pancreas, acinar cells can be identified by the presence of amylase while ductal  
210 cells express SOX9 (Kopp et al., 2012) In control pancreata, ductal cells can be identified by  
211 SOX9 positive nuclei that are frequently also positive for the proliferation marker Ki67. In  
212 *Atxn10<sup>Cagg</sup>* pancreata there are a large number of cells that are positive for SOX9 and Ki67 but lack  
213 amylase, suggesting an increase in the number of ductal cells. Intriguingly, there are also cells that  
214 are positive for SOX9 and Ki67 that also express amylase. In the most severely affected pancreata,  
215 a population of ciliated cells that lack SOX9, amylase, and Ki67 are present (**Figure 6A**). Closer  
216 evaluation of *Atxn10<sup>Cagg</sup>* pancreata showed a substantial increase in Vimentin positive cells

217 accompanied by a decrease in E-Cadherin expression. Cells that did maintain E-Cadherin  
218 expression exhibited highly disorganized E-Cadherin cellular localization (**Figure 6B**). Compared  
219 to control pancreata, *Atxn10<sup>Cagg</sup>* pancreata exhibit a significantly higher number of Ki67 positive  
220 cells (P=0.0004; N= 3 Cre- and 4 Cre+ animals) (**Figure 6C and D**). Furthermore, *Atxn10<sup>Cagg</sup>*  
221 pancreata appear to exhibit an increase in the density of primary cilia in the exocrine region of the  
222 pancreas (**Figure 6E**). Arl13b positive cilia are normally present throughout the islet of the control  
223 pancreas, but are infrequent in the exocrine region (**Supplemental figure 5, left**). In *Atxn10<sup>Cagg</sup>*  
224 pancreata the islets exhibit longer cilia, and the exocrine regions of the pancreas, which are  
225 typically nonciliated, have a high density of ciliated cells (**Supplemental figure 5, right**).  
226 Collectively this indicates that pancreatic cells are becoming more progenitor or mesenchymal-  
227 like.

228

229 *Loss of ATXN10 induces proliferation and structural abnormalities in the kidney.*

230 Analysis of the kidney by immunofluorescence staining for LTA (proximal tubules) and  
231 DBA (collecting tubules/ducts) identified tubule segments in *Atxn10<sup>Cagg</sup>* animals in which LTA  
232 and DBA colocalize, and in many tubules LTA is no longer restricted to the apical surface of the  
233 cells (**Figure 7A**). Actin staining in *Atxn10<sup>Cagg</sup>* kidneys further highlights structural  
234 disorganization. Actin organization in control kidneys shows the normal dense actin staining on  
235 the apical side of the renal epithelium compared to basolateral edges of the cell. In *Atxn10<sup>Cagg</sup>*  
236 kidneys this staining is no longer enriched at the apical surface but rather, there is actin  
237 accumulation around the entire cellular membrane in many tubules (**Figure 7B, red**). Furthermore,  
238 staining for the presence of cilia with acetylated  $\alpha$ -tubulin shows disorganized punctate cilia  
239 (**Figure 7B, green**). To further support the loss of tubular structure in *Atxn10<sup>Cagg</sup>* kidneys, we  
240 examined localization of the tight junction marker ZO-1. *Atxn10<sup>Cagg</sup>* samples show a disorganized  
241 appearance of ZO-1 staining in the cytoplasm compared to the expected membrane associated  
242 staining indicative of mature tight junctions (**Figure 7B, white**). In summary, the kidneys exhibit  
243 characteristics of disrupted epithelial polarity such as loss of apical localization of LTA, F-actin  
244 remodeling, small punctate cilia, and loss of ZO-1 localization at the cell-to-cell contacts.  
245 Furthermore, compared to control kidneys, *Atxn10<sup>Cagg</sup>* kidneys exhibit a significantly higher  
246 number of Ki67 positive cells (P=0.003; N= 3 Cre- and 4 Cre+ animals) (**Figure 7C and D**).

247

248 *Loss of ATXN10 results in more mesenchymal-like cells in renal tubules.*

249 Collectively, the mixed tubule identity paired with loss of apical restriction of LTA, actin  
250 remodeling, and loss of ZO-1 at the cell membrane in the renal proximal tubules led to the question  
251 of whether epithelial cells were becoming more mesenchymal-like. To test this, Cre negative  
252 induced (control) and Cre positive (*Atxn10<sup>Cagg</sup>*) induced kidneys were stained for E-Cadherin and  
253 Vimentin to identify epithelial and mesenchymal cells, respectively. In control kidneys, E-  
254 Cadherin staining is observed at the basolateral membrane and at areas of cell-to-cell contact  
255 throughout the tubules. Vimentin staining is adjacent to the E-Cadherin positive basolateral  
256 membrane of the renal tubules. In contrast, cells in *Atxn10<sup>Cagg</sup>* tubules show LTA positive staining  
257 that is spread diffusely throughout the cell. Furthermore, these LTA positive cells do not express  
258 E-Cadherin, but rather become positive for the mesenchymal marker, Vimentin (**Figure 7E**).

259

## 260 **Discussion :**

261 Previous studies of *Atxn10* have focused on its role in SCA10, a pentanucleotide expansion  
262 disorder (Matsuura et al., 2000), but there is limited analysis of the direct consequence of mutations  
263 affecting coding regions. Studies highlighting the role of ATXN10 in cell biology have been  
264 performed *in vitro* and centered on its role in cell division. Additionally, studies using the G-LAP-  
265 Flp purification strategy in Intermedullary Collecting Duct Cells (IMCDs) identify ATXN10 as  
266 having indirect interactions with the ciliary transition zone and ciliopathy protein NPHP5 (Torres  
267 et al., 2009; Sang et al., 2011), suggesting that ATXN10 may play a role in cilia function or  
268 formation. Our findings show that ciliogenesis is not affected upon the loss of ATXN10 *in vitro*  
269 or *in vivo*. Consistent with previous reports, ectopic expression of ATXN10 in cultured cells shows  
270 diffuse localization within the cytoplasm with enrichment at the centrioles and base of the cilium.  
271 Previously reported interactions between ATXN10 and NPHP5 further support that ATXN10 is  
272 localized at the base of the cilium. Previous work has shown cell cycle specific localization of  
273 phosphorylated ATXN10. In cultured *Atxn10<sup>Cagg</sup>* renal epithelial cells grown to confluency and  
274 then induced for *Atxn10* loss, cells adopt a more fibroblast-like appearance, and the localization  
275 of ZO-1 to the sites of cell-to-cell contact is disrupted. In addition, we observe defects in  
276 chromosomal segregation with a high frequency of micronuclei along with chromosomal bridges.  
277 As a consequence, it is difficult to maintain cells in culture once *Atxn10* loss is induced.



278 *In vivo*, we see that *Atxn10* function is essential for viability. Expression of *Atxn10* is  
279 restricted to the developing heart until after E10.5 when expression expands rapidly to cells  
280 throughout the embryo. Not surprisingly, based on the highly localized expression pattern in the  
281 early embryo, loss of *Atxn10* resulted in severe pericardial effusion and ultimately cardiac failure.  
282 While *Atxn10* expression is concentrated in the developing heart through E10.5, defects are  
283 observed in the epithelial cells of the neural tube in *Atxn10<sup>KO</sup>* embryos. This is the earliest  
284 indication that ATXN10 plays a role in epithelial and endothelial cell maintenance.

285 To determine if ATXN10 is required in a tissue/cell type specific manner in the  
286 cardiovascular system during embryogenesis, *Atxn10* was deleted in the developing myocardium  
287 and endothelium using cTnT-Cre and Tie2-Cre, respectively. Both of these tissue specific  
288 conditional *Atxn10* knockouts result in embryonic lethality. In the case of *Atxn10<sup>Tie2</sup>* embryos,  
289 lethality typically occurs between E11.5- E13.5. In *Atxn10<sup>Tie2</sup>* embryos obtained at E10.5, the  
290 developing vasculature is present indicating that lethality is not a result of a failure in  
291 vasculogenesis; however, Tie-2 transgene activity is also present in hematopoietic progenitor cells,  
292 and this may also contribute to lethality in these animals (Tang et al., 2010)

293 Comparatively, *Atxn10<sup>cTnT</sup>* embryos exhibit cardiac abnormalities similar to those seen in  
294 null embryos but survive longer than *Atxn10<sup>KO</sup>* or *Atxn10<sup>Tie2</sup>* embryos. This could be due in part to  
295 delayed activation of Cre in this line or to mosaicism in expression of the Cre. Regardless, at E18.5  
296 the hearts of *Atxn10<sup>cTnT</sup>* embryos display reduced ventricular wall thickness and disorganization of  
297 ZO-1 and actin reminiscent of the defects observed in *Atxn10<sup>KO</sup>* embryos at earlier time points.

298 Interestingly, the importance of ATXN10 is not limited to embryonic development. Using  
299 the inducible Cagg-Cre model, loss of ATXN10 in adult animals causes a rapid decline in health  
300 and results in lethality approximately 3 weeks post-induction. Necropsy and histological analysis  
301 point to moderate to severe pancreatic abnormalities and gastritis paired with reduced food intake  
302 as the leading cause of lethality. Additional renal abnormalities likely also contribute to their  
303 progressively worsening condition. Furthermore, an increase in purple staining, or cytoplasmic  
304 basophilia, was observed in *Atxn10<sup>Cagg</sup>* pancreata and kidneys. This phenomena is a result of RNA  
305 in the cytoplasm and is indicative of a regenerative epithelial cell or a precursor state in which a  
306 cell has recently stopped dividing (Chan, 2014).

307 EMT is a vital process during development. Post-developmentally it is associated with  
308 cancer metastasis, migration, and invasion (Yamashita et al., 2018). The cellular events included



309 in this process are disruption to cell polarity, loss of epithelial cell-to-cell junctions,  
310 downregulation of epithelial markers such as E-cadherin and Zonula occludens (ZO-1) paired with  
311 an up-regulation of mesenchymal markers such as Vimentin, alterations to the cytoskeletal  
312 architecture, and an increase in secretory abilities. *Atxn10<sup>Cagg</sup>* kidneys exhibit four of these  
313 characteristics: loss of apical restriction of LTA, dissolution of ZO-1 localization at the membrane,  
314 downregulation of E-cadherin paired with an up-regulation of Vimentin, and alterations in the actin  
315 cytoskeletal network. Collectively, these point to EMT in *Atxn10<sup>Cagg</sup>* kidneys. EMT of renal tubule  
316 epithelial cells is associated with the kidney's injury and repair process (Humphreys et al., 2008).  
317 Further indication that the kidney is attempting to repair following an injury is an increase in Ki67  
318 positive cells. In the kidney, baseline proliferation is normally very low. While Ki67 is commonly  
319 used as a proliferative marker, cells begin to acquire Ki67 in the nucleus during S phase of the cell  
320 cycle, and its presence persists throughout the G2 and M phases. The onset of G1 initiates  
321 degradation of Ki67 (Miller et al., 2018). These cellular mechanisms have been considered to be  
322 part of the kidney's adaptive repair process, which ultimately results in fibrosis (Nadasdy et al.,  
323 1994; Sheng and Zhuang, 2020).

324 In *Atxn10<sup>Cagg</sup>* pancreata, the exocrine regions also exhibit similar actin misorganization, a  
325 loss of E-cadherin, up-regulation of Vimentin, and an increase in Ki67 positive cells. In the  
326 pancreas, the typical cellular response to an injury is through acinar-to-ductal metaplasia (ADM).  
327 Specifically, during ADM the epithelial pancreatic acinar cells are thought to assume a more  
328 progenitor or ductal epithelial cell status (Storz, 2017). Unlike the kidney, *Atxn10<sup>Cagg</sup>* pancreata  
329 exhibit the added phenomena of an increase in ciliation in the exocrine region. In a normal  
330 pancreas, the cell types that are predominantly ciliated reside in the islet, and the ducts with the  
331 acini typically never possess a cilium (Augereau et al., 2016). Like *Atxn10<sup>Cagg</sup>* kidneys, the  
332 pancreata also exhibit an increase in Ki67 positive cells. In both of these tissues, baseline  
333 proliferation is normally very low. It is possible that this prolonged proliferation stage in both the  
334 kidney and the pancreas is a failed repair process that would likely result in fibrosis if animals  
335 were to survive long enough.

336 The rapid decline in health of *Atxn10<sup>Cagg</sup>* animals prevents the observation of longer term  
337 abnormalities. In the congenital model, the disposition towards cardiac abnormalities is likely due  
338 to the spatiotemporal expression pattern of *Atxn10*; however, in the inducible model it is currently  
339 unclear as to why specific tissues are preferentially effected. It is probable that if animals lived

340 longer or if tissue specific Cre mouse lines were used, similar functions of ATXN10 in additional  
341 tissues would be uncovered. In the affected organs, the pancreatic acinar cells, renal epithelial  
342 tubules, and glandular epithelium are specifically disrupted. These epithelial cells begin to exhibit  
343 signs of disrupted polarity followed by loss of epithelial markers such as E-Cadherin and ZO-1.  
344 Concurrently, the mesenchymal marker, Vimentin, begins to be expressed in these cells indicating  
345 that they are likely undergoing EMT.

346 Collectively we show that ATXN10 is located at the base of the primary cilium, but it is  
347 not necessary for ciliogenesis. Furthermore, we show that ATXN10 is necessary for both  
348 embryonic and post-embryonic survival with loss in adult animals resulting in an EMT-like  
349 progression in the kidney and pancreas and with cells also undergoing ADM in the pancreas. In  
350 none of the adult induced mutants did we observe phenotypes consistent with SCA raising the  
351 possibility that the pentanucleotide repeat in the SCA10 patients may not be due to loss of Atxn10  
352 protein directly; however, the complication with this assessment is that the mice die rapidly  
353 following induction, and this may preclude the presentation of SCA phenotypes.

354

## 355 **Materials and Methods**

### 356 *Generation of Atxn10 mutant alleles*

357 All animal studies were conducted in compliance with the National Institutes of Health *Guide for*  
358 *the Care and Use of Laboratory Animals* and approved by the Institutional Animal Care and Use

359 Committee at the University of Alabama at Birmingham. Mice were maintained on LabDiet<sup>®</sup> JL  
360 Rat and Mouse/Irr 10F 5LG5 chow. The *Atxn10<sup>KO</sup>* allele (*tmla*) was rederived from sperm  
361 obtained from the Knockout Mouse Project (KOMP) Repository into C57/B6J strain mice. Mice  
362 were maintained on a mixed B6/129 background. *Atxn10* conditional allele (*tmlc*) mice were  
363 generated by mating the *Atxn10<sup>KO</sup>* to FlpO recombinase mice (C57BL/6J) thus removing the LacZ  
364 and Neo cassettes and generating a conditional allele (*tmlc*; flox). Progeny that contained the  
365 recombined allele were crossed off of the FlpO line and bred to respective Cre recombinase males.  
366 Here we refer to these alleles as the *tmla* (*Atxn10<sup>KO</sup>*), *tmlc* (*Atxn10<sup>flox</sup>*) and *tmld* (*Atxn10<sup>Cagg</sup>*,  
367 *Atxn10<sup>cTnT</sup>*, or *Atxn10<sup>Tie2</sup>*) alleles. Primers used for genotyping are as follows: 5'-  
368 GACTTTTGGCACCACACAGC-3', 5'-GTGGAAGGGCTGAAACTGG-3', 5'-  
369 TCGTGGTATCGTTATGCGCC-3', 5'- ATCACGACGCGCTGTATC-3', and 5'-  
370 ACATCGGGCAAATAATATCG-3'.

371

372 *Generation and transfection of ATXN10 expression constructs*

373 The *MmAtxn10* coding sequence was cloned into the pEGFP-N1 vector (Clontech) using primers  
374 designed with XhoI and AgeI restriction sites. *MmAtxn10::EGFP-N1* plasmids were transfected  
375 into cells using *TransIT*<sup>®</sup>-2020 DNA per manufacturer guidelines (Mirus, MIR5404).

376

377 *Embryo Isolation*

378 Timed pregnancies were established with embryonic time-point of E0.5 being noted at noon on  
379 the morning of observing the copulatory plug. To isolate embryos, pregnant females were  
380 anesthetized using isoflurane followed by cervical dislocation. Embryonic tissues or whole  
381 embryos were isolated and fixed in 4% paraformaldehyde (Sigma PFA, 158127) in PBS.

382

383  *$\beta$ -Galactosidase staining*

384 For whole mount or slice  $\beta$ -Galactosidase staining, samples were fixed (0.2% glutaraldehyde  
385 (Sigma), 5mM EGTA, 2mM MgCl<sub>2</sub> in 1X PBS) at 4°C for 40 minutes. Samples were rinsed three  
386 times for 15 minutes at 4°C (0.02% Igepal, 0.01% Sodium Deoxycholate, and 2mM MgCl<sub>2</sub> in 1X  
387 PBS). Samples were immersed in staining solution overnight in the dark at 37°C (1mg/ml X-gal,  
388 0.02% Igepal, 0.01% Sodium Deoxycholate, 5mM potassium Ferricyanide, 5mM potassium  
389 Ferrocyanide, and 2mM MgCl<sub>2</sub> in 1X PBS). Samples were post-fixed in 4% PFA and stored at  
390 4°C. Embryos were imaged using a Nikon SMZ800 stereo microscope. Sections were counter  
391 stained using Nuclear Fast Red (Sigma).

392

393 *Isolation of Mouse Embryonic Fibroblasts (MEFs)*

394 Embryos were isolated at either E9.5 (*Atxn10*<sup>KO/KO</sup>) or E13.5 (conditional lines). Following the  
395 removal of the liver (E13.5 only) and head, embryos were mechanically dissociated and cultured  
396 in DMEM (Gibco, 21063-021) supplemented with 10% Fetal Bovine Serum, 1X Penicillin and  
397 Streptomycin, 0.05% Primocin, 3.6 $\mu$ l/0.5L  $\beta$ -mercaptoethanol. Cilia formation was induced using  
398 media containing 0.5% FBS.

399

400 *Primary kidney epithelium cell culture*

401 Mice were anesthetized with isofluorane followed by cervical dislocation. Kidneys were removed  
402 and mechanically dissociated. Resulting minced tissue was filtered through a 70mm cell strainer.  
403 Tubules were cultured in DMEM (Gibco, 11039-021) supplemented with 5% FBS, Epidermal  
404 Growth Factor (recombinant human, 10ng/ml), Insulin (recombinant human, 5 µg/ml),  
405 Hydrocortisone (36ng/ml), Epinephrine (0.5 µg/ml), Triiodo-L-thyronine (4pg/ml), and  
406 Transferrin (recombinant human, 5 µg/ml) (Growth Medium 2 SupplementPack, PromoCell, C-  
407 39605).

408

#### 409 *Pathology and histology*

410 Mice were anesthetized with 0.1 ml/ 10 g of body weight dose of 2.0% tribromoethanol (Sigma  
411 Aldrich, St. Louis, MO) and transcardially perfused with PBS followed by 4% paraformaldehyde.  
412 Tissues were post-fixed in 4% PFA overnight at 4°C, cryoprotected by submersion in 30% sucrose  
413 in PBS for 16–24 hours, then embedded in OCT, and cryosectioned for immunofluorescence, and  
414 Hematoxylin (Fisher Chemical, SH26-500D) and Eosin (Sigma-Aldrich, HT110132-1L) staining  
415 was performed. Pathological and histological analyses for *Atxn10<sup>Cagg</sup>* pancreata, kidneys, spleen,  
416 retina, lung, and liver were performed by the Comparative Pathology Lab (UAB) as follows.  
417 Briefly, mice were necropsied and tissues were fixed in 10% neutral buffered formalin overnight.  
418 Tissues were prosected and processed then 5 µM sections were stained with Hematoxylin and  
419 Eosin. Slides were evaluated for tissue histopathology by a board certified veterinary pathologist  
420 in blinded fashion.

421

#### 422 *Immunofluorescence microscopy*

423 Ten (10) µm tissue sections were used for immunofluorescence microscopy. For staining MEFs,  
424 cells were grown on 0.1% gelatin coated glass cover slips until confluent, then serum starved using  
425 DMEM containing 0.5% FBS for 24 hours to induce cilia formation (Breslow and Nachury, 2015).  
426 Sections were fixed with 4% PFA for 10 minutes, permeabilized with 0.1% Triton X-100 in PBS  
427 for 8 minutes and then blocked in a PBS solution containing 1% BSA, 0.3% TritonX-100, 2%  
428 (vol/vol) normal donkey serum and 0.02% sodium azide for one hour at room temperature. Primary  
429 antibody incubation was performed in blocking solution overnight at 4°C. Primary antibodies  
430 include: Acetylated α-tubulin (Sigma, T7451) direct conjugated to Alexa 647 (Invitrogen,  
431 A20186) and used at 1:1000, Arl13b (Proteintech, 1771-1AP, 1:500), PECAM1 (Abcam, ab7388,

432 1:250), E-Cadherin (Abcam, ab11512, 1:300), Phalloidin (Invitrogen, A12380 or A12379, 1:300)  
433 Ki67 conjugated to PE, (ThermoFisher, 12-5698-80, 1:300 ) cTnT (DSHB, RV-C2, 1:300), ZO-1  
434 (R40.76, 1:2), Vimentin (Abcam, ab92547, 1:300), Amylase (Abcam, ab189341, 1:1000) Sox9  
435 (Abcam, ab185230, 1:300), Fluorescein labeled Lotus tetragobolobus lectin/LTA (Vector  
436 Laboratories, FL-1321, 1:250), Rhodamine labeled Dolichos Biflorus Agglutinin/DBA (Vector  
437 Laboratories, RL-1032, 1:250). Cryosections were washed with PBS three times for five minutes  
438 at room temperature. Secondary antibodies diluted in blocking solution were added for one hour  
439 at room temperature. Secondary antibodies included: Donkey conjugated Alexa Fluor 647, 488,  
440 and 594 (Invitrogen, 1:1000). Samples were washed in PBS and stained with Hoechst nuclear stain  
441 33258 (Sigma-Aldrich) for 5 minutes at room temperature. Cover slips were mounted using  
442 SlowFade Diamond Antifade Mountant (Life Technologies). All other fluorescence images were  
443 captured on Nikon Spinning-disk confocal microscope with Yokogawa X1 disk, using Hamamatsu  
444 flash4 sCMOS camera. 60x apo-TIRF (NA=1.49), 40x plan fluor (NA=1.3), or 20x Plan Fluor  
445 Multi-immersion (NA=0.8) objectives were used. Images were processed using Nikon's Elements  
446 or Fiji software.

447

#### 448 *Tamoxifen Cre induction*

449 Recombination of the conditional allele was induced in *Atxn10<sup>fllox/fllox</sup>; CAGG-cre<sup>ERT2</sup>* mice at 6 and  
450 8 weeks old by a single intraperitoneal (IP) injection of 9mg tamoxifen (Millipore Sigma , T5648)  
451 per 40g (body weight) in corn oil. Induction of cell lines was achieved by exposure to media  
452 supplemented with 1mM 4-hydroxytamoxifen for 24h.

453

#### 454 *Statistics*

455 Calculations were performed using Graphpad Prism and Microsoft Excel. Specific tests used are  
456 indicated in figure legends with significance indicated as follows: \*  $p \leq 0.05$ , \*\*  $p \leq 0.01$ , \*\*\*  
457  $p \leq 0.001$ . Error bars indicate Standard Error of the Mean (SEM).

458

#### 459 **Acknowledgments :**

460 The authors would like to thank the members of Dr. Bradley K. Yoder's (UAB) and Dr. Jeremy F.  
461 Reiter's (UCSF) laboratories for intellectual and technical support on the project. The authors  
462 would like to thank the UAB Comparative Pathology Lab and Jeremy Foote, DVM, PhD for his

463 expertise. The authors would like to thank the National Institute of Child Health and Human  
464 Development and the National Heart, Lung, and Blood Institute for financial support of these  
465 studies.

466

#### 467 **Competing Interests :**

468 The authors have no competing interests to declare.

469

#### 470 **Funding :**

471 This work was supported by National Institutes of Health [ R01 GM118361-04 to BKY and JFR,  
472 F31HL150898 and 5T32HL007918-20 to MRB].

473

474

475

476

#### References

477

- 478 Augereau, C., Collet, L., Vargiu, P., Guerra, C., Ortega, S., Lemaigre, F.P., and Jacquemin, P.  
479 (2016). Chronic pancreatitis and lipomatosis are associated with defective function of  
480 ciliary genes in pancreatic ductal cells. *Hum Mol Genet* 25, 5017-5026.
- 481 Breslow, D.K., and Nachury, M.V. (2015). Analysis of soluble protein entry into primary cilia  
482 using semipermeabilized cells. *Methods Cell Biol* 127, 203-221.
- 483 Chan, J.K. (2014). The wonderful colors of the hematoxylin-eosin stain in diagnostic surgical  
484 pathology. *Int J Surg Pathol* 22, 12-32.
- 485 Dickinson, M.E., Flenniken, A.M., Ji, X., Teboul, L., Wong, M.D., White, J.K., Meehan, T.F.,  
486 Weninger, W.J., Westerberg, H., Adissu, H., Baker, C.N., Bower, L., Brown, J.M., Caddle,  
487 L.B., Chiani, F., Clary, D., Cleak, J., Daly, M.J., Denegre, J.M., Doe, B., Dolan, M.E., Edie,  
488 S.M., Fuchs, H., Gailus-Durner, V., Galli, A., Gambadoro, A., Gallegos, J., Guo, S., Horner,  
489 N.R., Hsu, C.W., Johnson, S.J., Kalaga, S., Keith, L.C., Lanoue, L., Lawson, T.N., Lek, M.,  
490 Mark, M., Marschall, S., Mason, J., Mcelwee, M.L., Newbigging, S., Nutter, L.M.,  
491 Peterson, K.A., Ramirez-Solis, R., Rowland, D.J., Ryder, E., Samocha, K.E., Seavitt, J.R.,  
492 Selloum, M., Szoke-Kovacs, Z., Tamura, M., Trainor, A.G., Tudose, I., Wakana, S., Warren,  
493 J., Wendling, O., West, D.B., Wong, L., Yoshiki, A., International Mouse Phenotyping, C.,  
494 Jackson, L., Infrastructure Nationale Phenomin, I.C.D.L.S., Charles River, L., Harwell,  
495 M.R.C., Toronto Centre For, P., Wellcome Trust Sanger, I., Center, R.B., Macarthur, D.G.,  
496 Tocchini-Valentini, G.P., Gao, X., Flicek, P., Bradley, A., Skarnes, W.C., Justice, M.J.,  
497 Parkinson, H.E., Moore, M., Wells, S., Braun, R.E., Svenson, K.L., De Angelis, M.H.,  
498 Herault, Y., Mohun, T., Mallon, A.M., Henkelman, R.M., Brown, S.D., Adams, D.J., Lloyd,  
499 K.C., Mckerlie, C., Beaudet, A.L., Bucan, M., and Murray, S.A. (2016). High-throughput  
500 discovery of novel developmental phenotypes. *Nature* 537, 508-514.



- 501 Humphreys, B.D., Valerius, M.T., Kobayashi, A., Mugford, J.W., Soeung, S., Duffield, J.S.,  
502 McMahan, A.P., and Bonventre, J.V. (2008). Intrinsic epithelial cells repair the kidney  
503 after injury. *Cell Stem Cell* 2, 284-291.
- 504 Jiao, K., Kulesa, H., Tompkins, K., Zhou, Y., Batts, L., Baldwin, H.S., and Hogan, B.L. (2003). An  
505 essential role of Bmp4 in the atrioventricular septation of the mouse heart. *Genes Dev*  
506 17, 2362-2367.
- 507 Koni, P.A., Joshi, S.K., Temann, U.A., Olson, D., Burkly, L., and Flavell, R.A. (2001). Conditional  
508 vascular cell adhesion molecule 1 deletion in mice: impaired lymphocyte migration to  
509 bone marrow. *J Exp Med* 193, 741-754.
- 510 Kopp, J.L., Von Figura, G., Mayes, E., Liu, F.F., Dubois, C.L., Morris, J.P.T., Pan, F.C., Akiyama, H.,  
511 Wright, C.V., Jensen, K., Hebrok, M., and Sander, M. (2012). Identification of Sox9-  
512 dependent acinar-to-ductal reprogramming as the principal mechanism for initiation of  
513 pancreatic ductal adenocarcinoma. *Cancer Cell* 22, 737-750.
- 514 Li, J., Wang, J., Hou, W., Jing, Z., Tian, C., Han, Y., Liao, J., Dong, M.Q., and Xu, X. (2011).  
515 Phosphorylation of Ataxin-10 by polo-like kinase 1 is required for cytokinesis. *Cell Cycle*  
516 10, 2946-2958.
- 517 Luo, F., and Tao, Y.H. (2018). Nephronophthisis: A review of genotype-phenotype correlation.  
518 *Nephrology (Carlton)* 23, 904-911.
- 519 Malicki, J.J., and Johnson, C.A. (2017). The Cilium: Cellular Antenna and Central Processing Unit.  
520 *Trends Cell Biol* 27, 126-140.
- 521 Marz, P., Probst, A., Lang, S., Schwager, M., Rose-John, S., Otten, U., and Ozbek, S. (2004).  
522 Ataxin-10, the spinocerebellar ataxia type 10 neurodegenerative disorder protein, is  
523 essential for survival of cerebellar neurons. *J Biol Chem* 279, 35542-35550.
- 524 Matsuura, T., Yamagata, T., Burgess, D.L., Rasmussen, A., Grewal, R.P., Watase, K., Khajavi, M.,  
525 McCall, A.E., Davis, C.F., Zu, L., Achari, M., Pulst, S.M., Alonso, E., Noebels, J.L., Nelson,  
526 D.L., Zoghbi, H.Y., and Ashizawa, T. (2000). Large expansion of the ATTCT  
527 pentanucleotide repeat in spinocerebellar ataxia type 10. *Nat Genet* 26, 191-194.
- 528 Miller, I., Min, M., Yang, C., Tian, C., Gookin, S., Carter, D., and Spencer, S.L. (2018). Ki67 is a  
529 Graded Rather than a Binary Marker of Proliferation versus Quiescence. *Cell Rep* 24,  
530 1105-1112 e1105.
- 531 Nadasdy, T., Laszik, Z., Blick, K.E., Johnson, D.L., and Silva, F.G. (1994). Tubular atrophy in the  
532 end-stage kidney: a lectin and immunohistochemical study. *Hum Pathol* 25, 22-28.
- 533 Romani, M., Micalizzi, A., and Valente, E.M. (2013). Joubert syndrome: congenital cerebellar  
534 ataxia with the molar tooth. *Lancet Neurol* 12, 894-905.
- 535 Samsa, L.A., Yang, B., and Liu, J. (2013). Embryonic cardiac chamber maturation: Trabeculation,  
536 conduction, and cardiomyocyte proliferation. *Am J Med Genet C Semin Med Genet* 163C,  
537 157-168.
- 538 Sang, L., Miller, J.J., Corbit, K.C., Giles, R.H., Brauer, M.J., Otto, E.A., Baye, L.M., Wen, X., Scales,  
539 S.J., Kwong, M., Huntzicker, E.G., Sfakianos, M.K., Sandoval, W., Bazan, J.F., Kulkarni, P.,  
540 Garcia-Gonzalo, F.R., Seol, A.D., O'toole, J.F., Held, S., Reutter, H.M., Lane, W.S., Rafiq,  
541 M.A., Noor, A., Ansar, M., Devi, A.R., Sheffield, V.C., Slusarski, D.C., Vincent, J.B.,  
542 Doherty, D.A., Hildebrandt, F., Reiter, J.F., and Jackson, P.K. (2011). Mapping the NPHP-  
543 JBTS-MKS protein network reveals ciliopathy disease genes and pathways. *Cell* 145, 513-  
544 528.



- 545 Sharma, N., Berbari, N.F., and Yoder, B.K. (2008). Ciliary dysfunction in developmental  
546 abnormalities and diseases. *Curr Top Dev Biol* 85, 371-427.
- 547 Sheng, L., and Zhuang, S. (2020). New Insights Into the Role and Mechanism of Partial Epithelial-  
548 Mesenchymal Transition in Kidney Fibrosis. *Front Physiol* 11, 569322.
- 549 Storz, P. (2017). Acinar cell plasticity and development of pancreatic ductal adenocarcinoma.  
550 *Nat Rev Gastroenterol Hepatol* 14, 296-304.
- 551 Tang, Y., Harrington, A., Yang, X., Friesel, R.E., and Liaw, L. (2010). The contribution of the Tie2+  
552 lineage to primitive and definitive hematopoietic cells. *Genesis* 48, 563-567.
- 553 Tian, J., Tian, C., Ding, Y., Li, Z., Geng, Q., Xiahou, Z., Wang, J., Hou, W., Liao, J., Dong, M.Q., Xu,  
554 X., and Li, J. (2015). Aurora B-dependent phosphorylation of Ataxin-10 promotes the  
555 interaction between Ataxin-10 and Plk1 in cytokinesis. *Sci Rep* 5, 8360.
- 556 Torres, J.Z., Miller, J.J., and Jackson, P.K. (2009). High-throughput generation of tagged stable  
557 cell lines for proteomic analysis. *Proteomics* 9, 2888-2891.
- 558 Wakamiya, M., Matsuura, T., Liu, Y., Schuster, G.C., Gao, R., Xu, W., Sarkar, P.S., Lin, X., and  
559 Ashizawa, T. (2006). The role of ataxin 10 in the pathogenesis of spinocerebellar ataxia  
560 type 10. *Neurology* 67, 607-613.
- 561 Waragai, M., Nagamitsu, S., Xu, W., Li, Y.J., Lin, X., and Ashizawa, T. (2006). Ataxin 10 induces  
562 neurogenesis via interaction with G-protein beta2 subunit. *J Neurosci Res* 83, 1170-  
563 1178.
- 564 Yamashita, N., Tokunaga, E., Imori, M., Inoue, Y., Tanaka, K., Kitao, H., Saeki, H., Oki, E., and  
565 Maehara, Y. (2018). Epithelial Paradox: Clinical Significance of Coexpression of E-  
566 cadherin and Vimentin With Regard to Invasion and Metastasis of Breast Cancer. *Clin*  
567 *Breast Cancer* 18, e1003-e1009.

568  
569  
570

571 Figure Legends:

Figure 1.

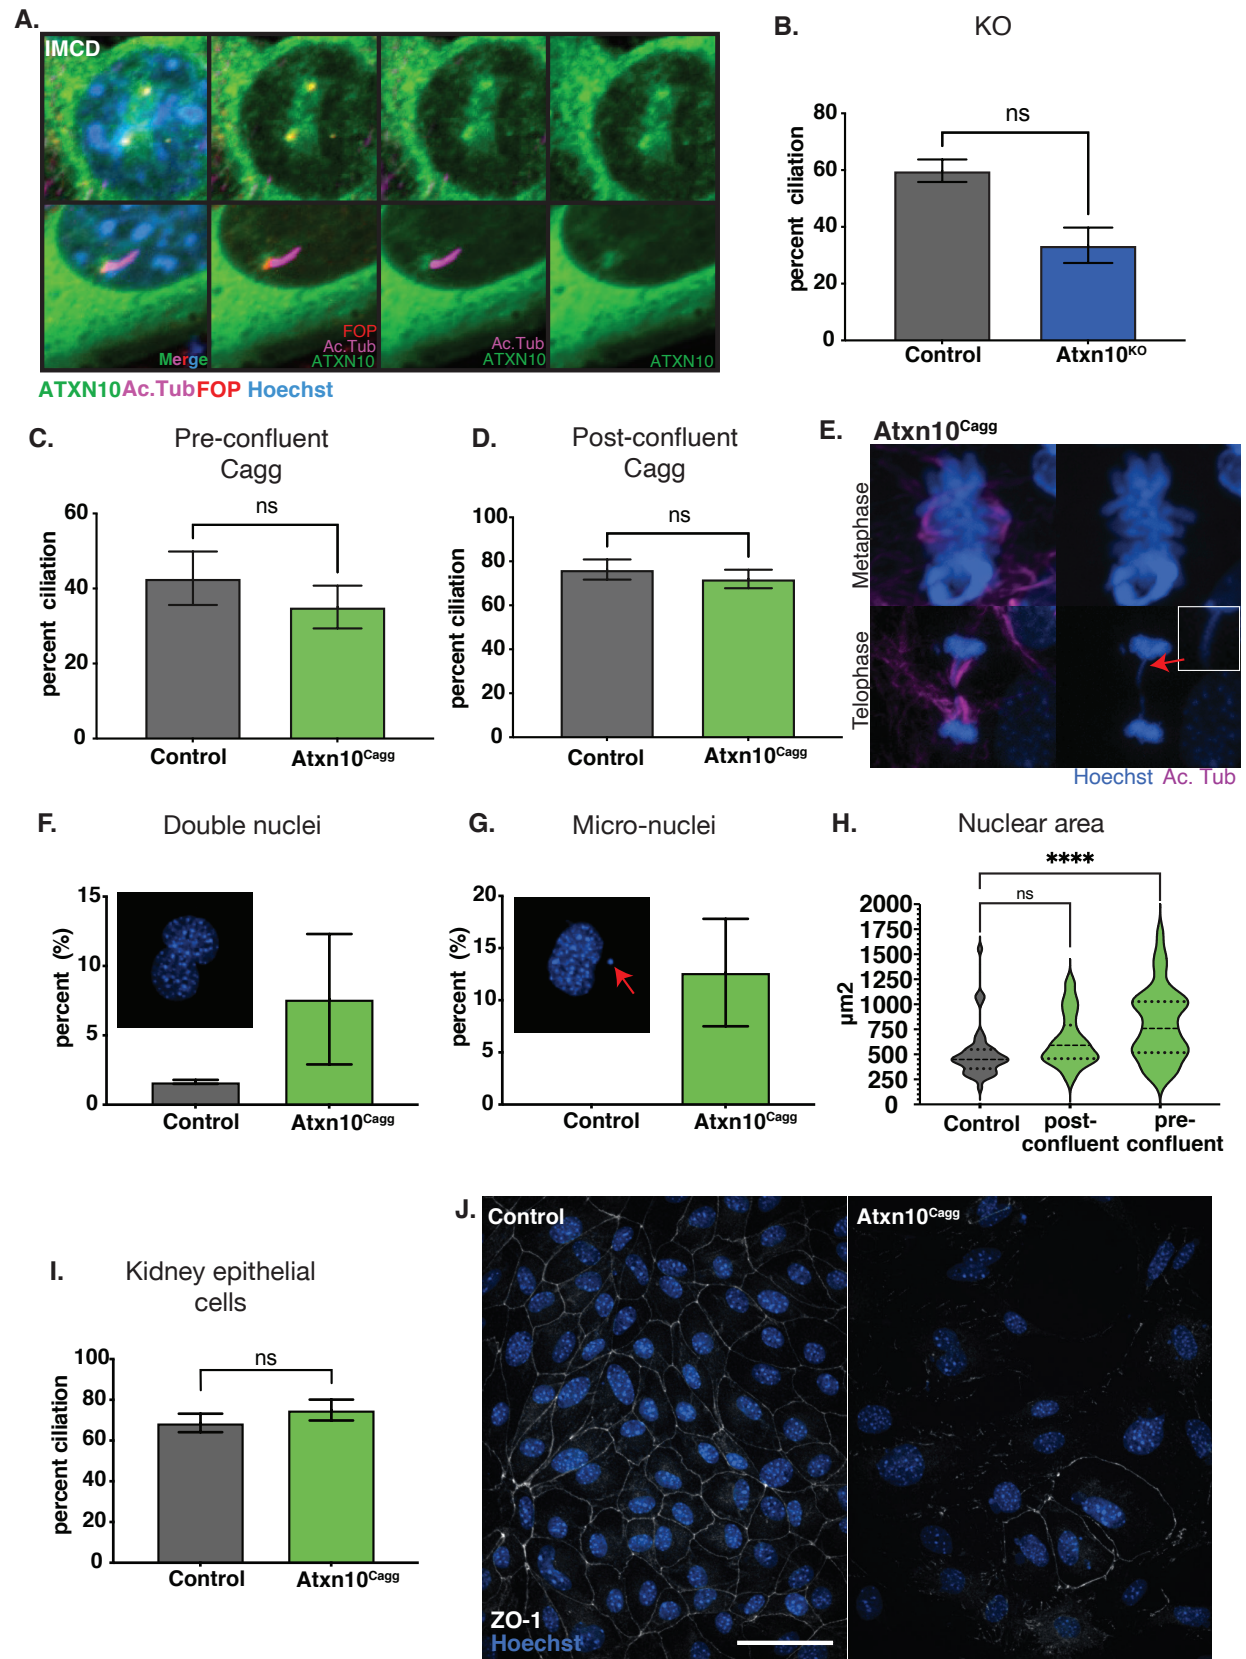

573 **Figure 1: *In vitro* analysis.** A) ATXN10::EGFP localized to the cilia basal body and centrioles in  
574 IMCD cells stained for cilia, Acetylated  $\alpha$ -tubulin (Ac. Tub, purple) and basal bodies, FGFR1  
575 oncogene partner (FOP, red), and hoechst (blue) for nuclei. B) Percent ciliation in control and  
576 *Atxn10<sup>KO</sup>* MEFs. C) Percent cilia in control and *Atxn10<sup>Cagg</sup>* MEFs when Cre is induced prior to  
577 confluency. D) Percent cilia in control and *Atxn10<sup>Cagg</sup>* MEFs when Cre is induced after confluency.  
578 E) Nuclear abnormalities observed in metaphase and telophase of the cell cycle in *Atxn10<sup>Cagg</sup>*  
579 MEFs. F and G) Percent of primary kidney epithelial cells containing two nuclei and exhibiting  
580 nuclear blebbing and micro-nuclei formation. H) Nuclear area ( $\mu\text{m}^2$ ) in primary kidney epithelial  
581 cells in control, and induced post and pre-confluent cells. I) Percent cilia in primary kidney  
582 epithelial cells from control and *Atxn10<sup>Cagg</sup>* animals that were post-confluency. J)  
583 Immunofluorescence staining for tight junction protein, zonula occludens-1 (ZO-1, white) in non-  
584 induced (control) and induced mutant (*Atxn10<sup>Cagg</sup>*) primary kidney epithelial cells (scale bar=  
585 50 $\mu\text{m}$ ). Statistical significance of nuclear area was determined using a one-way ANOVA with  
586 multiple comparisons. All other statistical significance was determined using unpaired T-test.  
587



Figure 2.

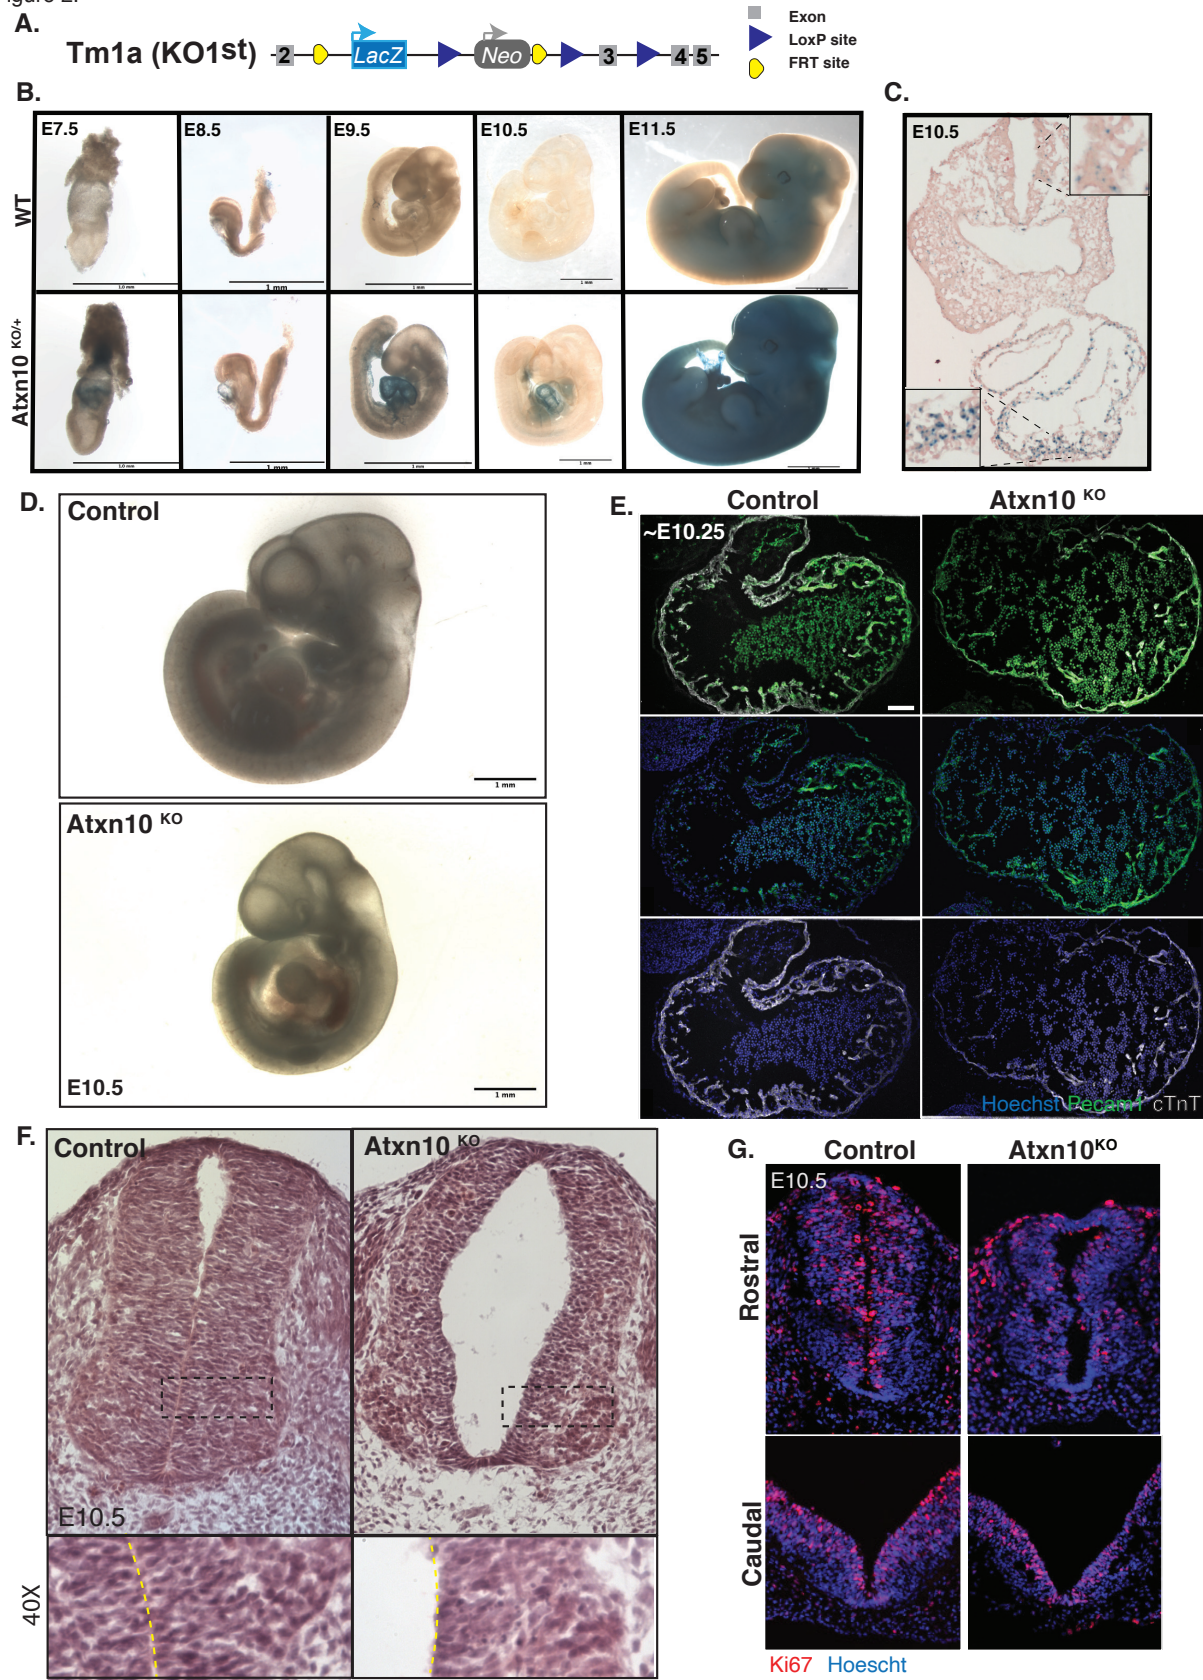

589 **Figure 2: Phenotypic analysis of congenital loss of ATXN10.** A) Schematic depicting the  
590 *Atxn10* KO1st allele. B)  $\beta$ -Galactosidase staining in wild-type (top) and heterozygous (bottom)  
591 animals at E7.5, E8.5, E9.5, E10.5, and E11.5. C)  $\beta$ -Galactosidase staining of a crosssection of an  
592 E10.5 heterozygous embryo. D) Images of wild-type (top) and *Atxn10*<sup>KO</sup> (bottom) embryos at  
593 E10.5 (scale bar = 1mm) E) Immunofluorescence staining for PECAM1 (green), cTnT (white),  
594 and hoechst (blue) in the heart of wild-type and *Atxn10*<sup>KO</sup> embryos at E10.5 (scale bar= 100  $\mu$ m).  
595 F) H&E staining of control and *Atxn10*<sup>KO</sup> rostral neural tubes at E10.5. G) Ki67 and nuclei staining  
596 of Caudal (top) and rostral (bottom) neural tubes in WT and *Atxn10*<sup>KO</sup>mutant animals.



Figure 3.

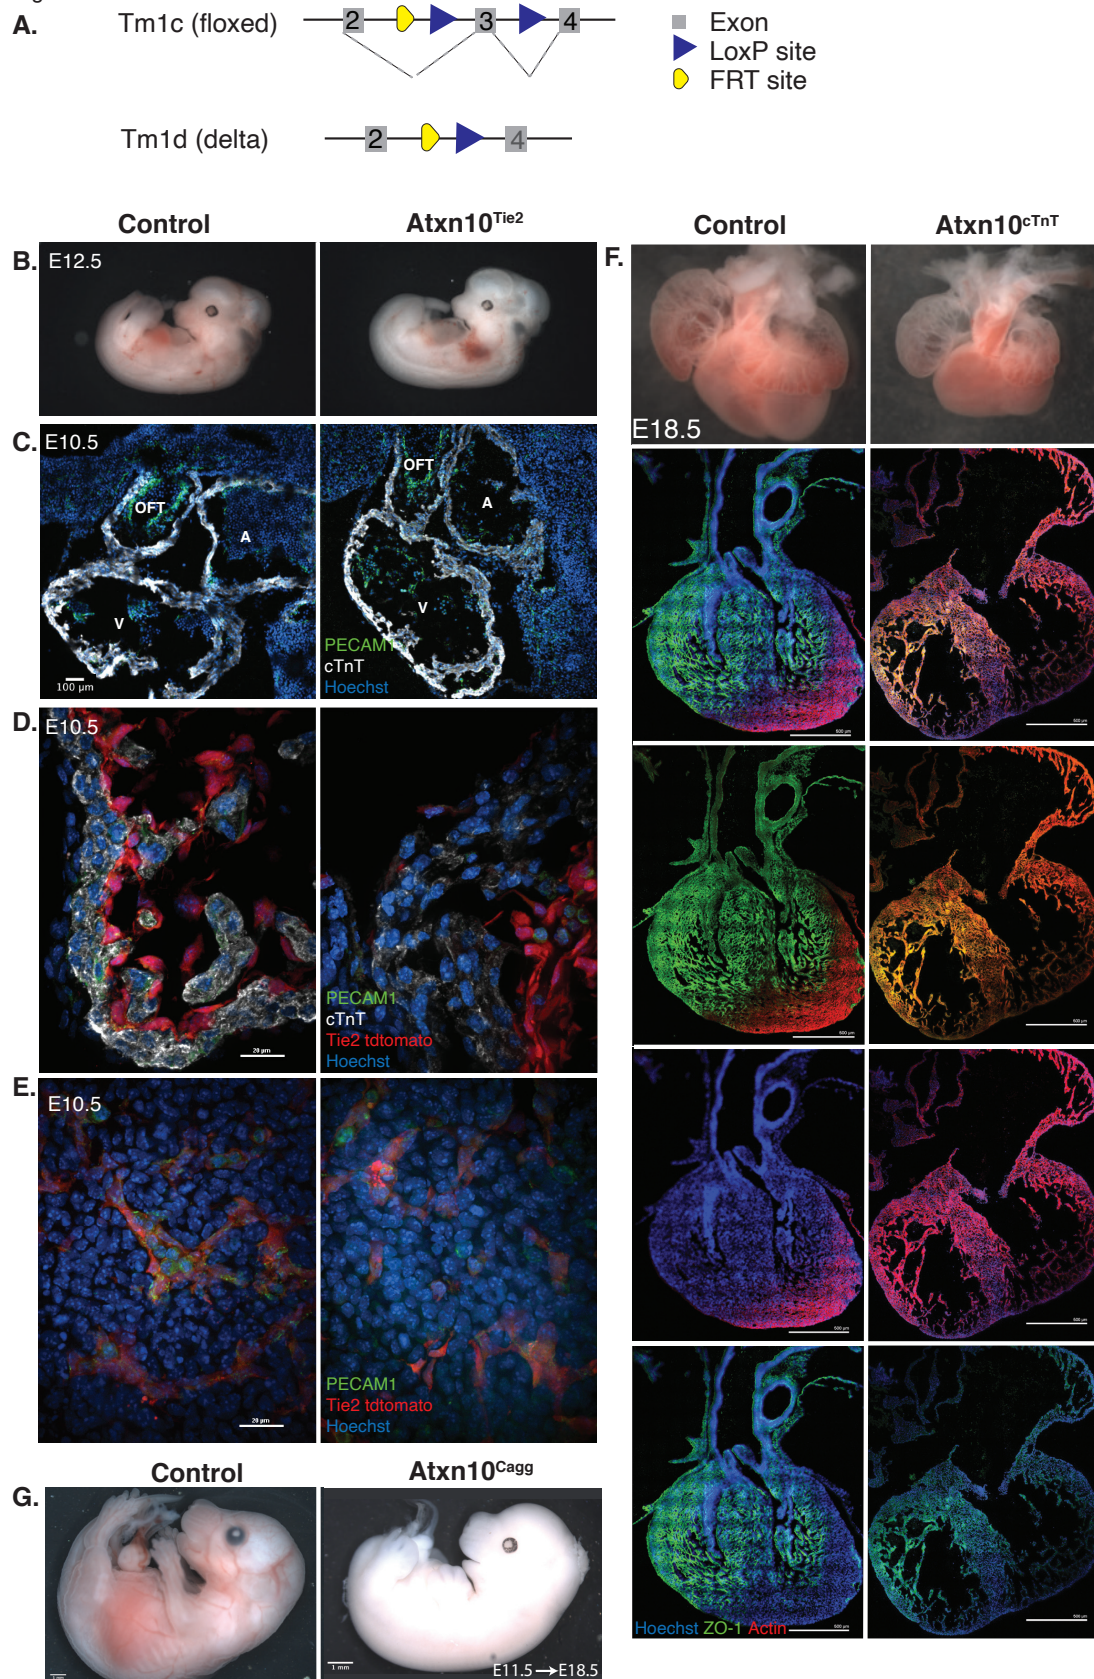

598 **Figure 3: Tissue specific ablation of ATXN10.** A) Schematic depicting the *Atxn10* tm1c (floxed)  
599 allele and schematic depicting the *Atxn10* tm1d (delta) allele. B) Control and *Atxn10*<sup>Tie2</sup> mutant  
600 embryos at E12.5. C) Immunofluorescence staining of cardiac crosssections taken from E10.5  
601 control and *Atxn10*<sup>Tie2</sup> embryos with markers for PECAM1 (green), cTnT (white), and hoechst  
602 (blue) (scale bar= 100 μm.) D) Immunofluorescence staining of cardiac trabeculae in E10.5 control  
603 and *Atxn10*<sup>Tie2</sup> embryos with green representing PECAM1, white representing cTnT, and nuclei  
604 shown in blue. Activity of Tie2-Cre is marked in red by tdtomato reporter (scale bar= 100 μm). E)  
605 Immunofluorescence staining of vasculature in E10.5 mesoderm in control and *Atxn10*<sup>Tie2</sup> embryos  
606 with PECAM1 (green), cTnT (white), hoechst (blue), and Tie2-Cre activity is marked in red by  
607 tdtomato reporter (scale bar= 100 μm). F) Hearts isolated from control and *Atxn10*<sup>cTnT</sup> embryos at  
608 E18.5. Immunofluorescence staining indicates ZO-1 shown in green, actin shown in red, and nuclei  
609 (blue) (scale bar= 500 μm). G) images of Control and *Atxn10*<sup>Cagg</sup> embryos induced in utero at  
610 E11.5 and isolated at E18.5 (scale= 1mm).



Figure 4.

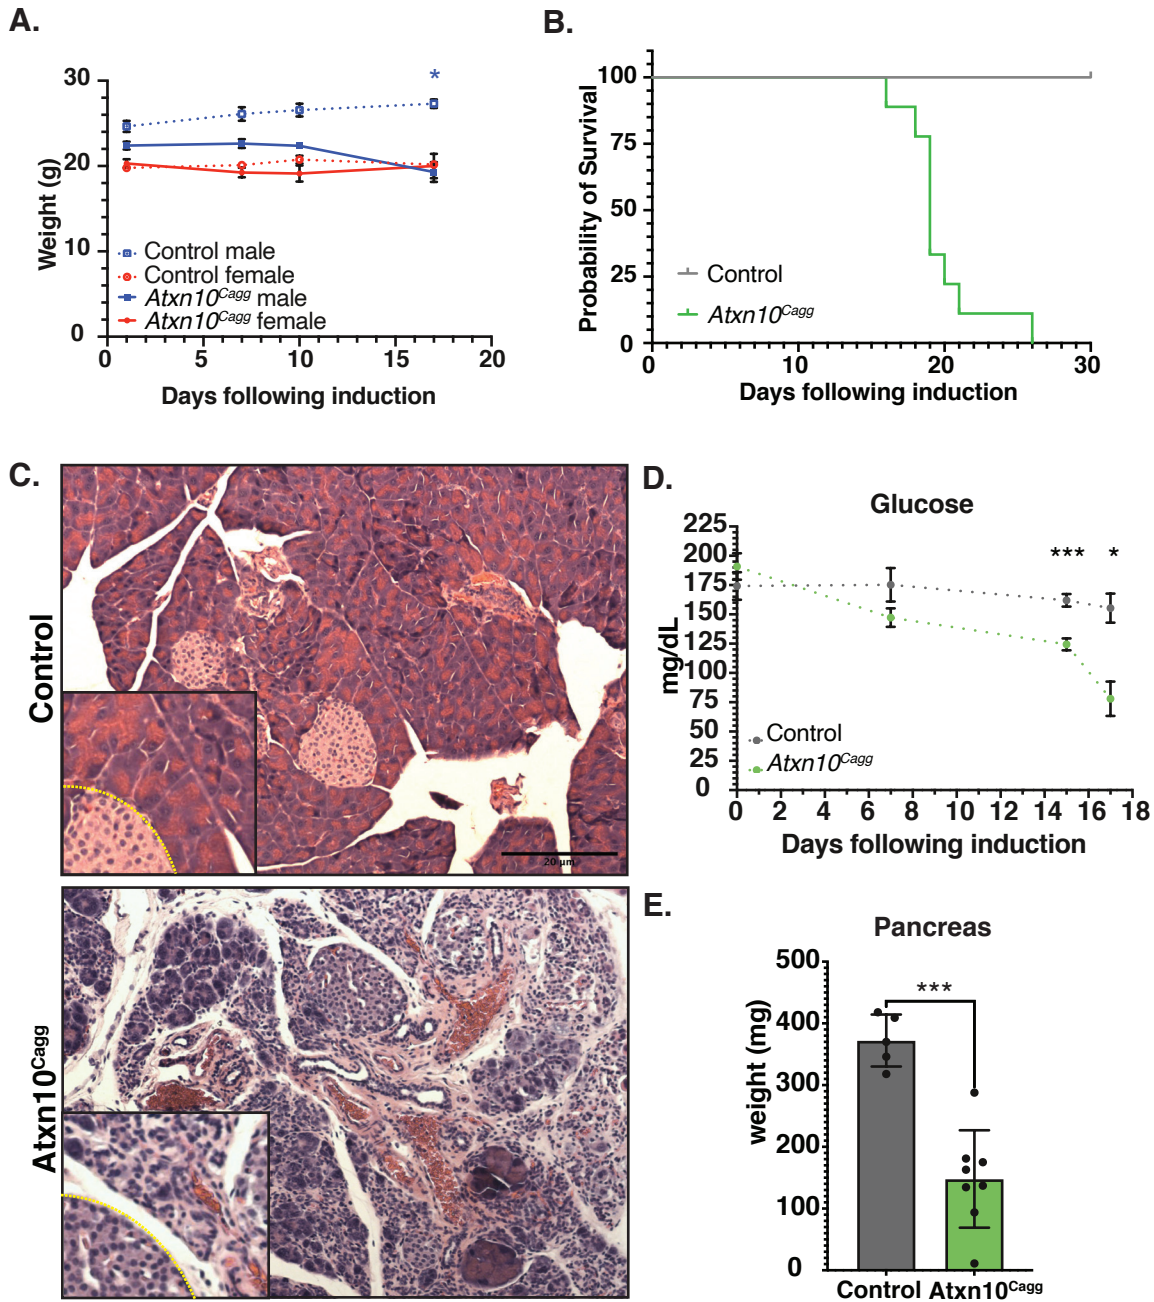

611  
 612 **Figure 4. Pancreas defects.** A) Weights following induction of Control and *Atxn10<sup>Cagg</sup>* animals  
 613 at 8 weeks old (P= 0.468 in male mice at 17 days post induction; N= 7 Cre- females, 2 Cre- males,  
 614 6 Cre+ females, and 4 Cre+ males). B) Kaplan-meier survival curve of Control (gray) and  
 615 *Atxn10<sup>Cagg</sup>* (green) animals induced at 6 weeks old (P<0.0001; N=9 Cre- and 9 Cre+ animals). C)  
 616 H&E staining of *Atxn10<sup>lox/lox</sup>* (left) and *Atxn10<sup>Cagg</sup>* (right) pancreas. D) Levels of blood glucose  
 617 in nonfasted mice (P=0.002 at 15 days post induction and P=0.0399 at 17 days post induction; N=5  
 618 Cre- and 8 Cre+ up to 15 days post induction and N= 3 Cre- and 4 Cre+ mice at day 17). E)  
 619 Pancreatic weight at 15-17 days post induction (P=0.0001, N=5 Cre- and 8 Cre+ animals).

620 Statistical significance was determined using mixed effects analysis with multiple comparisons for  
621 change in weight and change in glucose levels over time. Statistical significance of survival was  
622 determined via log-rank test. Statistical significance of pancreas weight was determined using  
623 unpaired T-test.

Figure 5.

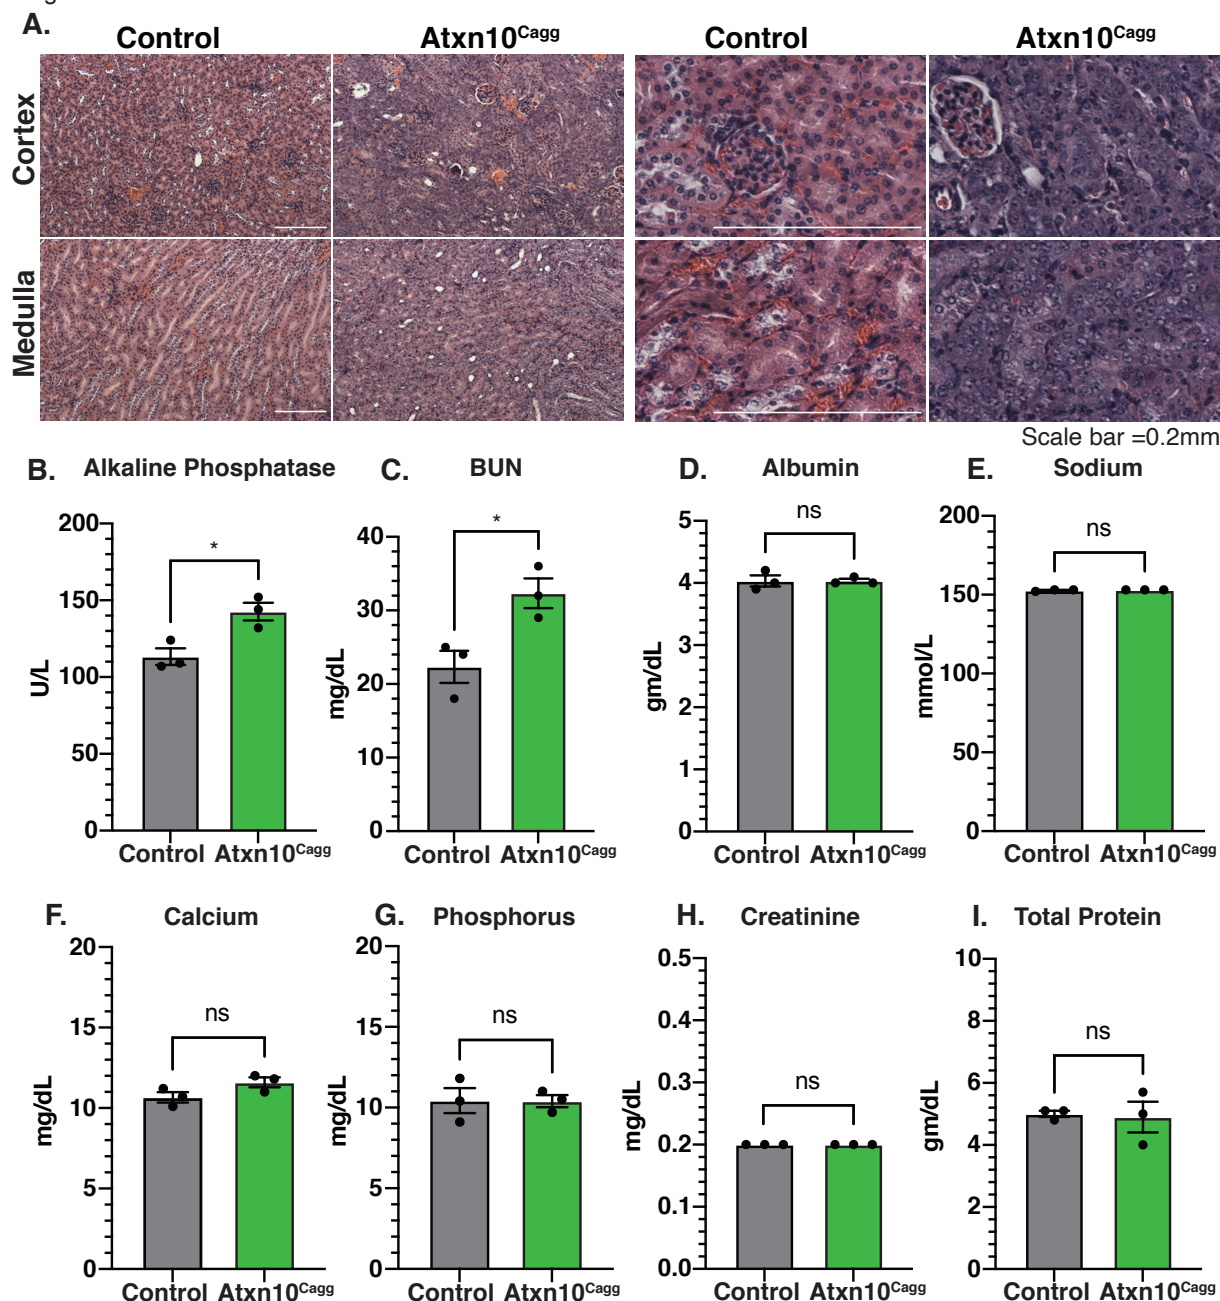

624 **Figure 5. Renal defects.** A) H&E staining of Control (left) and *Atxn10<sup>Cagg</sup>* (right) kidneys 17 days  
625 post induction. Blood serum levels of B) Alkaline Phosphatase (P= 0.02), C) BUN (P=0.03), D)  
626 Albumin, E) Sodium, F) Calcium, G) Phosphorous, H) Creatinine, and I) total protein in Control  
627 and *Atxn10<sup>Cagg</sup>* animals 17 days post induction. Scale bars=50 $\mu$ m. Statistical analysis was  
628 performed using unpaired T-test.  
629



Figure 6.

A.

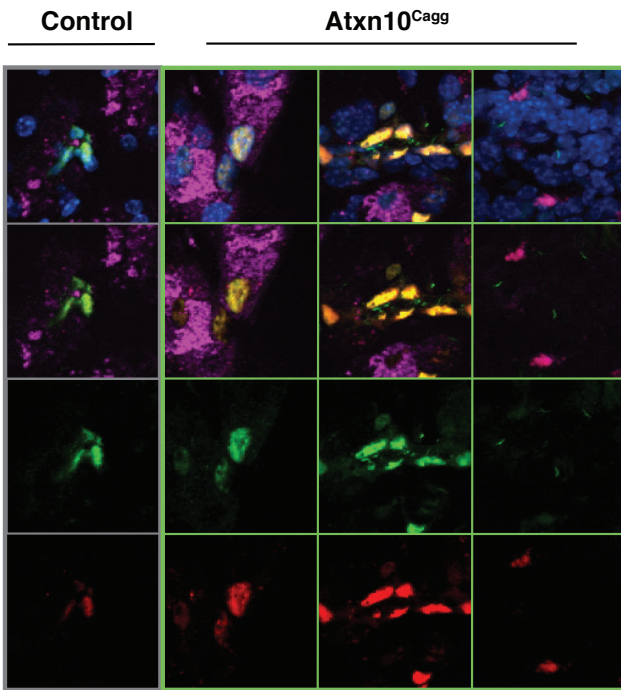

Hoechst, Amylase, SOX9, Arl13b, Ki67

B.

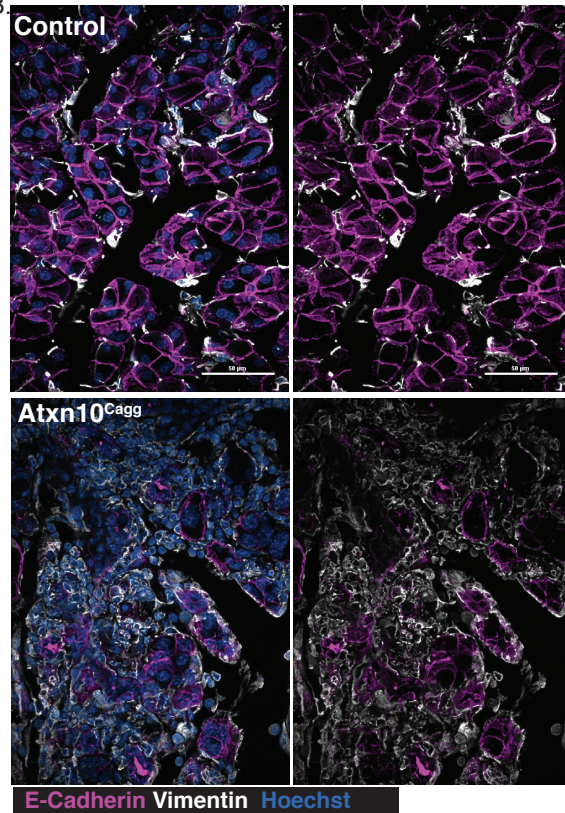

E-Cadherin Vimentin Hoechst

C.

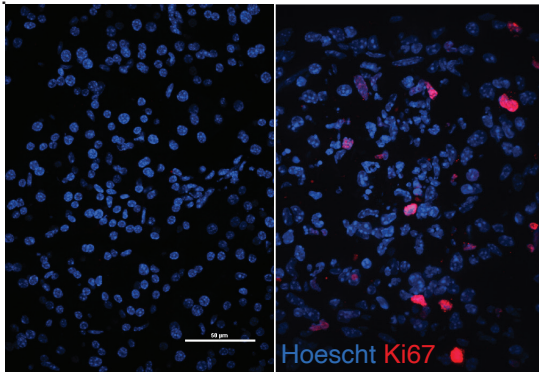

Hoescht Ki67

D.

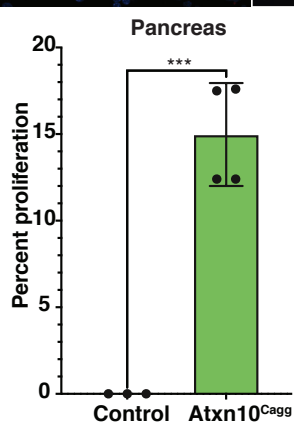

E.

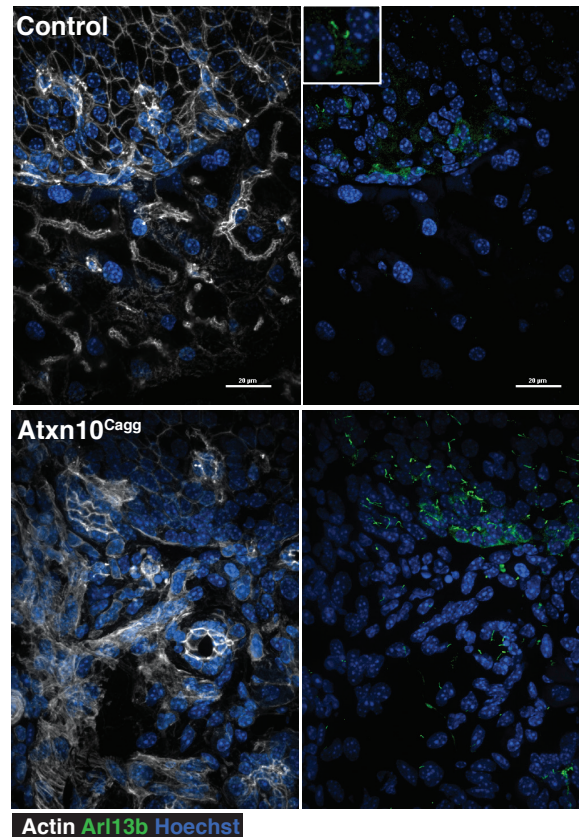

Actin Arl13b Hoechst

631 **Figure 6. Loss of epithelial characteristics in adult *Atxn10<sup>Cagg</sup>* pancreata.**

632 A) Immunofluorescence staining for amylase (purple), SOX9 (green), Arl13b (green), Ki67 (red),  
633 and Hoechst (blue) in control and *Atxn10<sup>Cagg</sup>* pancreata. B) Immunofluorescence staining for E-  
634 cadherin (purple), Vimentin (white), and Hoechst (blue) in Control (top) and *Atxn10<sup>Cagg</sup>* (bottom)  
635 pancreas. C) Images and D) quantification of proliferation in the pancreas (P=0.003; N=3 Cre- and  
636 4 Cre+ animals) as shown by Ki67 staining (red) (scale bar= 50  $\mu$ m). E) Immunofluorescence  
637 staining for Actin (white), cilia shown by Arl13b staining (green) and Hoechst (blue) in Control  
638 (left) and *Atxn10<sup>Cagg</sup>* (right) pancreata (scale bar= 20  $\mu$ m).



Figure 7.

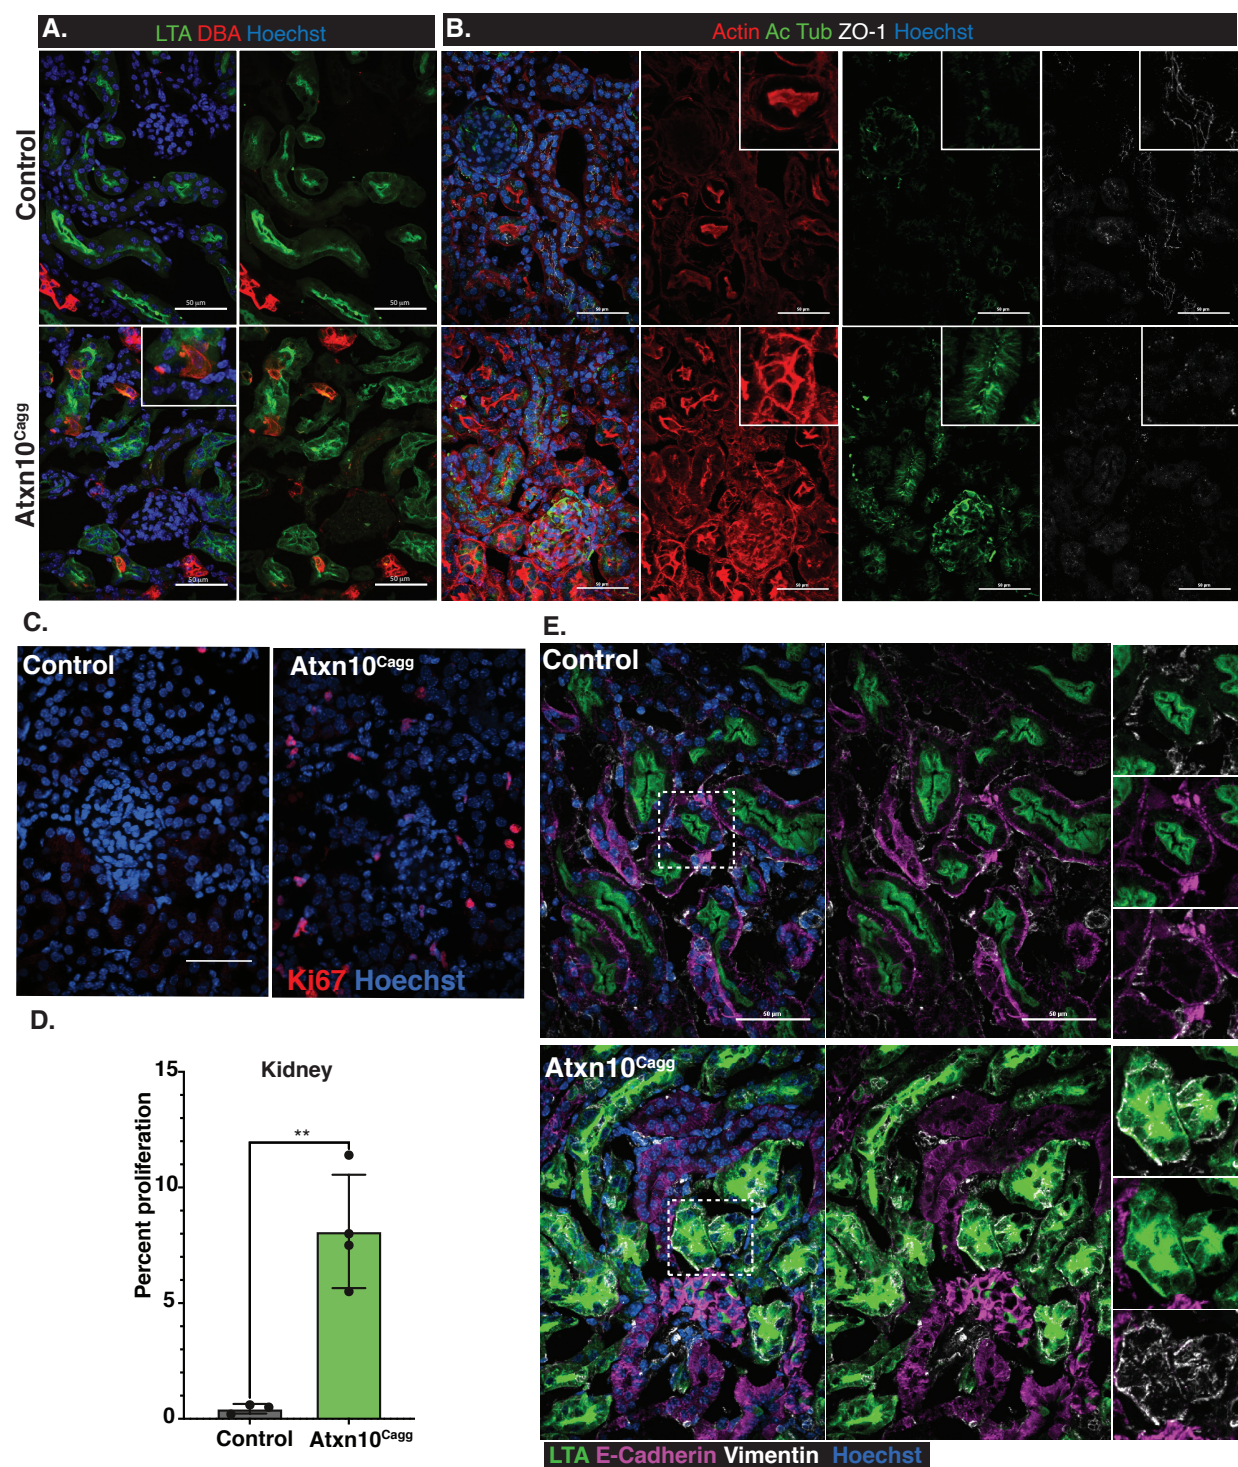

639  
640 **Figure 7. Loss of epithelial characteristics in adult induced *Atxn10<sup>Cagg</sup>* kidney.** A) Staining  
641 for proximal tubule (LTA, green) and collecting duct (DBA, red) in Control (top) and *Atxn10<sup>Cagg</sup>*  
642 (bottom). B) Staining for Actin (Phalloidin, red), cilia (Acetylated  $\alpha$ -tubulin, green), and ZO-1  
643 (white) in Control (top) and *Atxn10<sup>Cagg</sup>* (bottom) kidneys. C) Images and D) quantification of

644 proliferation in the kidney ( $P=0.0004$ ;  $N=3$  Cre- and 4 Cre+ animals) as shown by Ki67 (red)  
645 staining. E) Immunofluorescence staining for LTA (green), E-cadherin (purple), Vimentin (white),  
646 and Hoechst (blue) in Control (top) and *Atxn10<sup>Tie2</sup>* (bottom) kidneys. (scale bar=50  $\mu$ m)

Supplemental Figure 1.

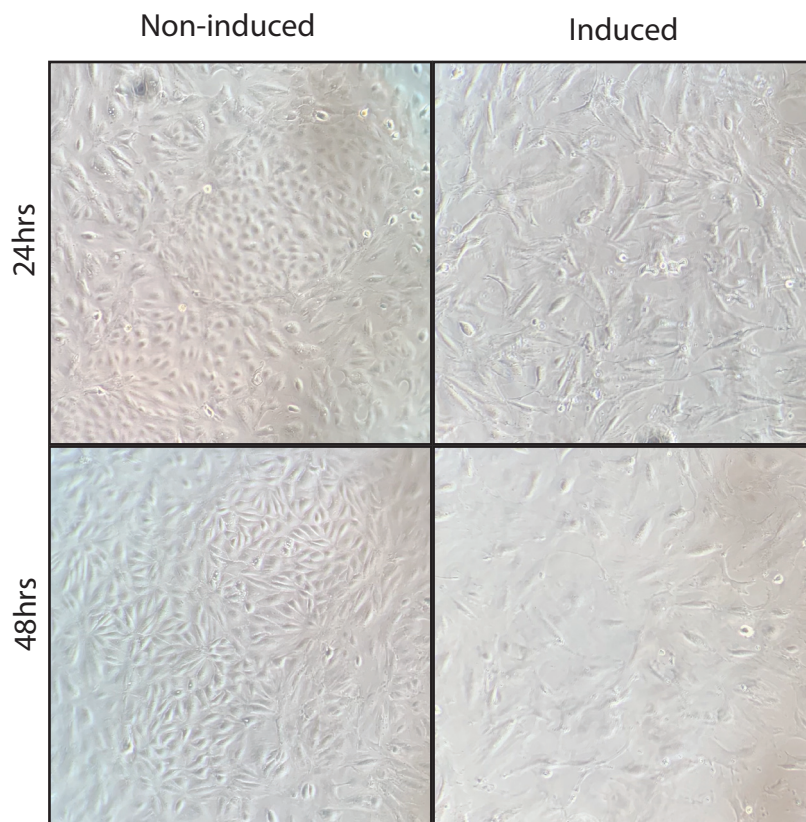

647 **Supplemental Figure 1. Primary kidney epithelial cells post induction.** Phase contrast image  
648 of induced (right) and non-induced (left) cultured primary kidney epithelial cells from  
649 *Atxn10<sup>flox/flox</sup>; Cagg-Cre<sup>ERT</sup>* mouse kidneys. Top panels indicate cells 24 hours post induction and  
650 bottom panels indicate cells 48 hours post induction.  
651

Supplemental Figure 2.

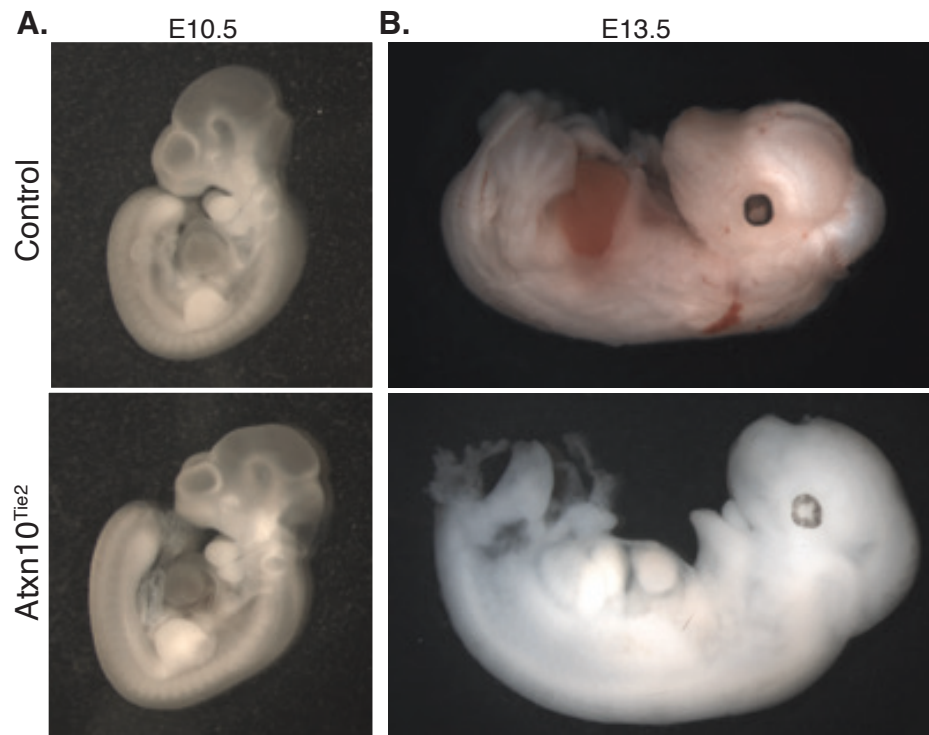

652  
653 **Supplemental Figure 2.** *Atxn10<sup>Tie2</sup>* embryos. Control (top) and *Atxn10<sup>Tie2</sup>* (bottom) embryos at  
654 A) E10.5 (left) and B) E13.5 (right).



Supplemental Figure 3.

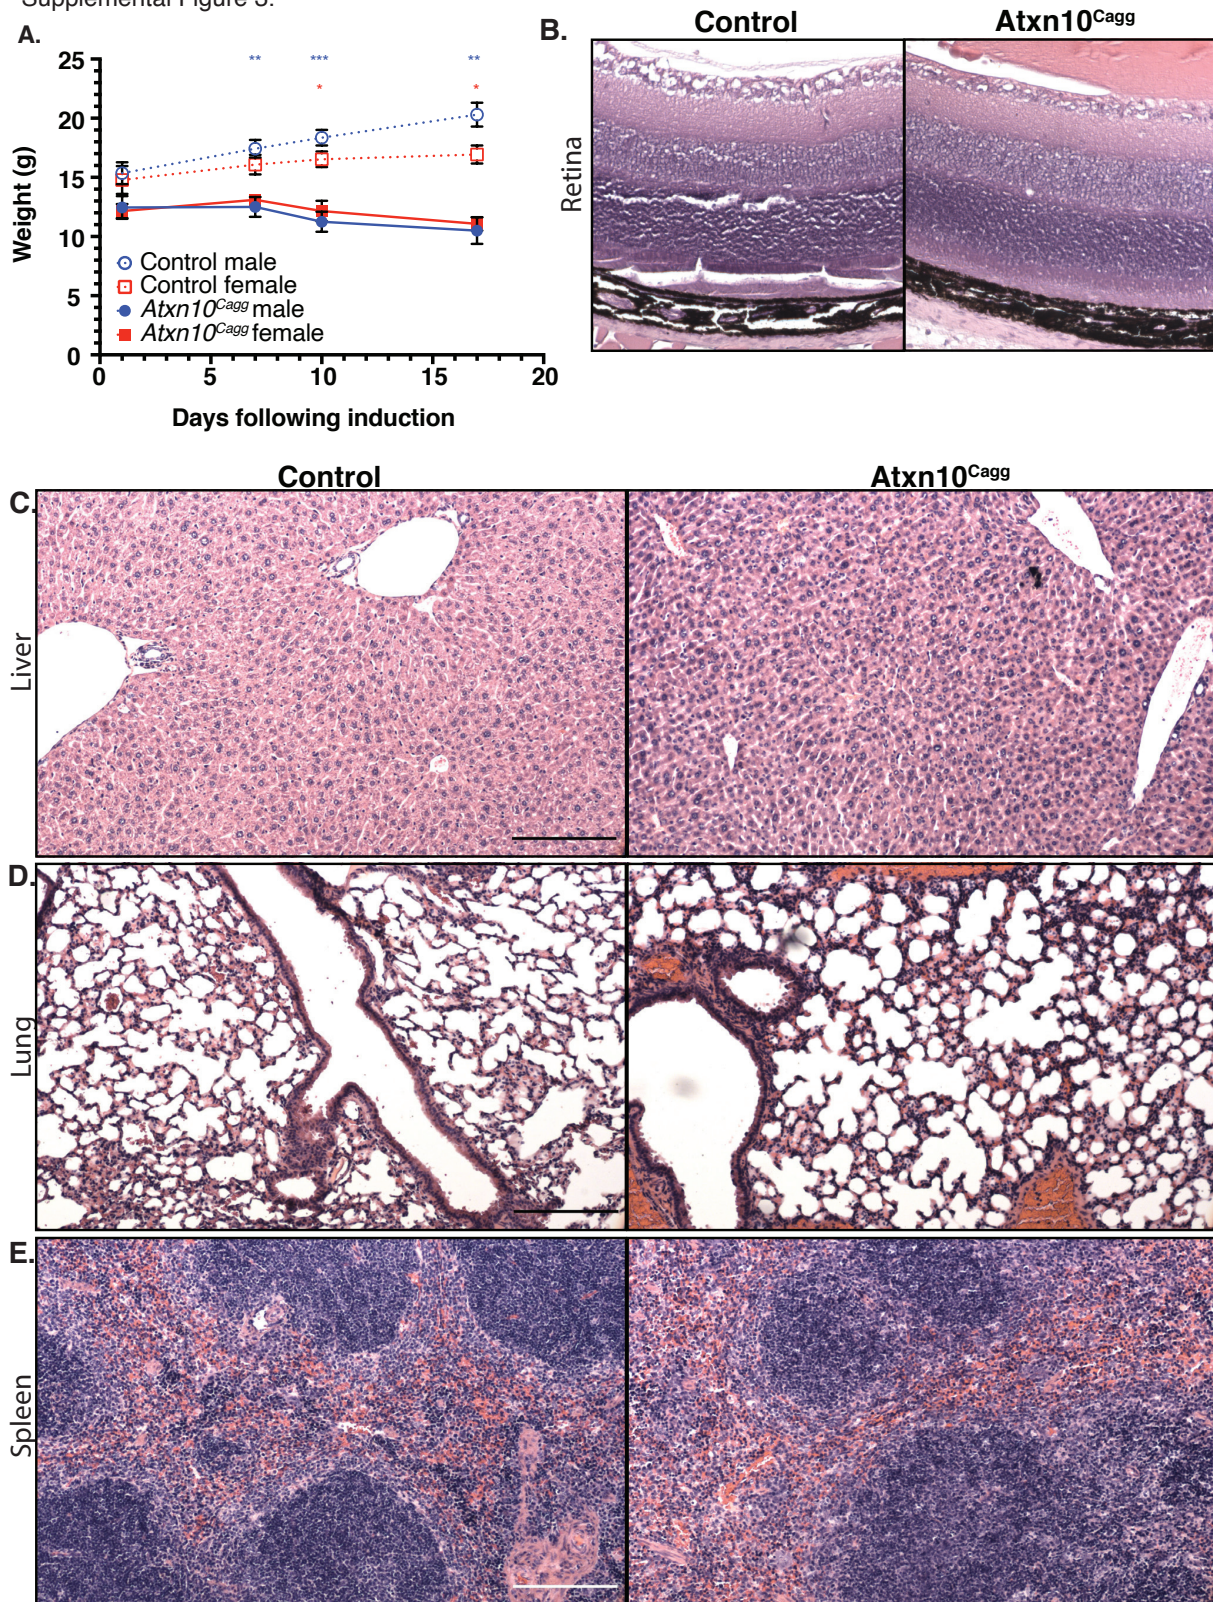



656 **Supplemental Figure 3. *Atxn10<sup>Cagg</sup>* unaffected tissues.** A) Weights following induction of  
657 *Atxn10<sup>lox/lox</sup>* and *Atxn10<sup>Cagg</sup>* animals at 4 weeks old (Statistical significance is designated by red  
658 asteriks for females and blue asteriks for males; N= 5 Cre- females, 6 Cre- males, 4 Cre+ females,  
659 and 6 Cre+ males). H&E staining of Control (left) and *Atxn10<sup>Cagg</sup>* (right) B) retina, C) liver, which  
660 demonstrates hepatocyte atrophy consistent with anorexia and weight loss D) lung, E) spleen.  
661 Scale bars=50µm. Statistical significance was determined using mixed effects analysis with  
662 multiple comparisons.

Supplemental Figure 4.

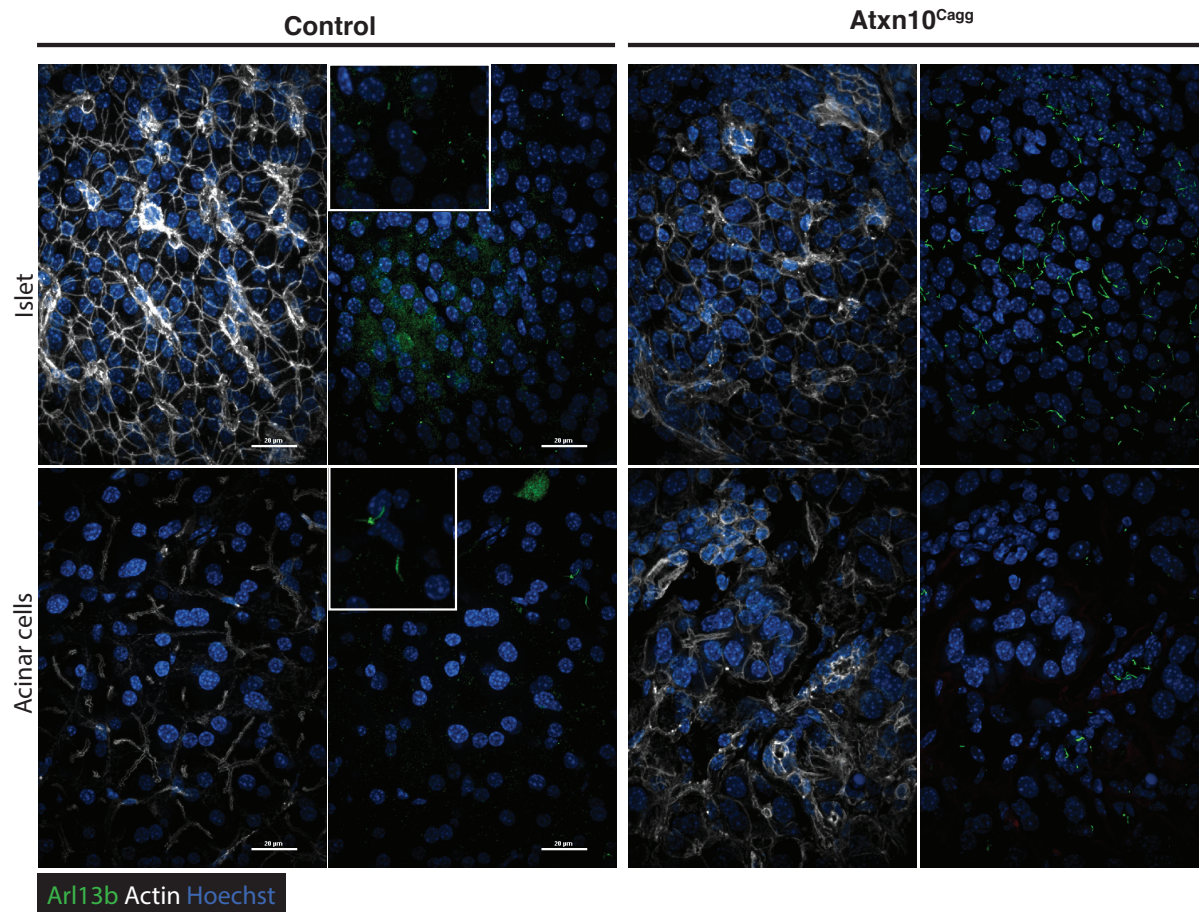

663 **Supplemental Figure 4. Ectopic cilia in *Atxn10<sup>Cagg</sup>* pancreas.** Immunofluorescence staining for  
664 Actin (white), cilia shown by Arl13b staining (green), and Hoechst (blue) in Control and  
665 *Atxn10<sup>Cagg</sup>* islet (top) and acinar cells (bottom) in the pancreas (scale bar= 20 µm).  
666
